# Supplementary material
Source: Royal Society of Chemistry journal article supplement (doi:10.1039/d6cp00939e)
Supplement: d6cp00939e1.pdf [file d6cp00939e1.pdf]

## Electronic Supplementary Information (ESI)

# Unsaturated C<sub>6</sub> Fatty Acid Methyl Esters as Reference Molecules for Biodiesel: Kinetics of H-Atom Abstraction and Addition

Joel Leitão Nascimento,<sup>a</sup> Antonio Fernández-Ramos<sup>\*b</sup>, and Tiago Vinicius Alves<sup>\*a</sup>

<sup>b</sup> *Departamento de Físico-Química, Instituto de Química, Universidade Federal da Bahia, Rua Barão de Jeremoabo, 147, Salvador, Bahia, 40170-115, Brazil*

<sup>b</sup> *Center for Research in Biological Chemistry and Molecular Materials (CIQUS), University of Santiago de Compostela, 15782, Santiago de Compostela, Spain.*

\*E-mail address: qf.ramos@usc.es; tiagova@ufba.br

## Sections

|       |                                                                                        |    |
|-------|----------------------------------------------------------------------------------------|----|
| S1.   | Reactions Analyzed . . . . .                                                           | 4  |
| S2.   | Conformational Search for Methyl ( <i>Z</i> )- and ( <i>E</i> )-hex-2-enoate . . . . . | 6  |
| S3.   | Nomenclature IUPAC - Dihedral Angles . . . . .                                         | 8  |
| S4.   | Partition Functions of the Isomers . . . . .                                           | 8  |
| S5.   | Multistructural Factors . . . . .                                                      | 10 |
| S5.1. | ( <i>Z</i> )-2mhex . . . . .                                                           | 10 |
| S5.2. | ( <i>E</i> )-2mhex . . . . .                                                           | 11 |
| S5.3. | ( <i>Z</i> )-3mhex . . . . .                                                           | 12 |
| S5.4. | ( <i>E</i> )-3mhex . . . . .                                                           | 12 |
| S5.5. | ( <i>Z</i> )-4mhex . . . . .                                                           | 13 |
| S5.6. | ( <i>E</i> )-4mhex . . . . .                                                           | 14 |
| S5.7. | 5mhex . . . . .                                                                        | 14 |
| S6.   | Calculation of Overall Rate Constants . . . . .                                        | 17 |
| S7.   | Site-Specific MS-CVT/SCT Rate Constants . . . . .                                      | 20 |
| S7.1. | ( <i>Z</i> )-2mhex . . . . .                                                           | 20 |
| S7.2. | ( <i>E</i> )-2mhex . . . . .                                                           | 20 |
| S7.3. | ( <i>Z</i> )-3mhex . . . . .                                                           | 21 |
| S7.4. | ( <i>E</i> )-3mhex . . . . .                                                           | 22 |
| S7.5. | ( <i>Z</i> )-4mhex . . . . .                                                           | 22 |
| S7.6. | ( <i>E</i> )-4mhex . . . . .                                                           | 23 |
| S7.7. | 5mhex . . . . .                                                                        | 24 |
| S8.   | Fit Parameters MS-CVT/SCT Rate Constants . . . . .                                     | 24 |
| S8.1. | ( <i>Z</i> )-2mhex . . . . .                                                           | 25 |
| S8.2. | ( <i>E</i> )-2mhex . . . . .                                                           | 26 |
| S8.3. | ( <i>Z</i> )-3mhex . . . . .                                                           | 27 |
| S8.4. | ( <i>E</i> )-3mhex . . . . .                                                           | 27 |
| S8.5. | ( <i>Z</i> )-4mhex . . . . .                                                           | 28 |

|       |                              |    |
|-------|------------------------------|----|
| S8.6. | ( <i>E</i> )-4mhex . . . . . | 29 |
| S8.7. | 5mhex . . . . .              | 30 |

## Tables

|     |                                                                             |    |
|-----|-----------------------------------------------------------------------------|----|
| S1. | Analytical expressions for rate constants and corresponding parameters. . . | 25 |
|-----|-----------------------------------------------------------------------------|----|

## Figures

|     |                                                                                                                                                                                                                                                                                                                                                                                                                 |    |
|-----|-----------------------------------------------------------------------------------------------------------------------------------------------------------------------------------------------------------------------------------------------------------------------------------------------------------------------------------------------------------------------------------------------------------------|----|
| S1. | Representation of the mesomeric effect between the carbonyl group and the double bond in unsaturated esters. . . . .                                                                                                                                                                                                                                                                                            | 6  |
| S2. | Transmission coefficient $\gamma^{\text{CVT/SCT}}$ for the most stable transition state at each site of H-abstraction and addition in: (a) methyl ( <i>Z</i> )-hex-2-enoate, (b) methyl ( <i>E</i> )-hex-2-enoate, (c) methyl ( <i>Z</i> )-hex-3-enoate, (d) methyl ( <i>E</i> )-hex-3-enoate, (e) methyl ( <i>Z</i> )-hex-4-enoate, (f) methyl ( <i>E</i> )-hex-4-enoate, and (g) methyl hex-5-enoate. . . . . | 16 |
| S3. | Branching ratio of the summed contributions from H-abstraction and addition reaction sites for (a) methyl ( <i>Z</i> )-hex-2-enoate, (b) methyl ( <i>E</i> )-hex-2-enoate, (c) methyl ( <i>Z</i> )-hex-3-enoate, (d) methyl ( <i>E</i> )-hex-3-enoate, (e) methyl ( <i>Z</i> )-hex-4-enoate, (f) methyl ( <i>E</i> )-hex-4-enoate, and (g) methyl hex-5-enoate. . . . .                                         | 32 |

## S1. Reactions Analyzed

For this study, the reactions investigated involve hydrogen abstraction and addition processes in a specific class of molecules containing carbonyl functional groups. Hydrogen abstraction can occur both at the methyl group and at the carbon atoms located at the  $\alpha$ ,  $\beta$ ,  $\gamma$ ,  $\delta$ , and  $\epsilon$  positions relative to the carbonyl group. Conversely, hydrogen addition takes place at positions adjacent to the double bond, with the exact sites depending on its location within the molecule.

These positions correspond to  $\alpha$  and  $\beta$  in (X)-2mhex,  $\beta$  and  $\gamma$  in (X)-3mhex,  $\gamma$  and  $\delta$  in (X)-4mhex, and  $\delta$  and  $\epsilon$  in 5mhex, where X denotes either the *Z* or *E* stereoisomer. These considerations define the following reaction channels:

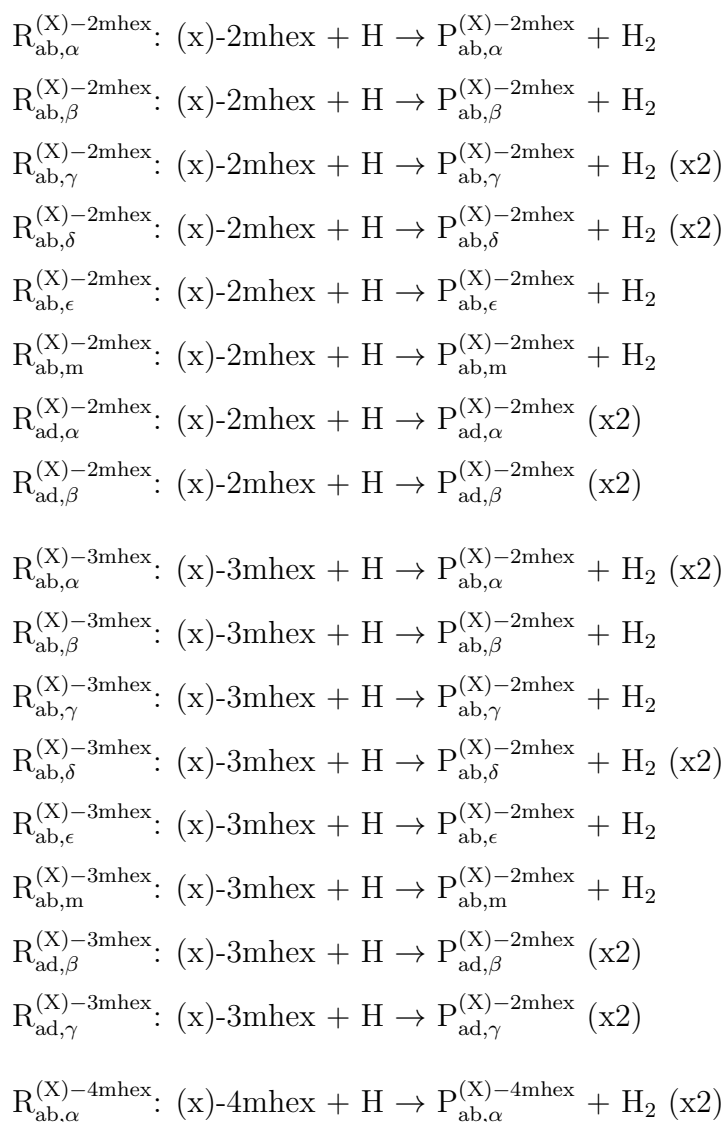

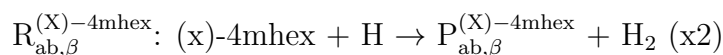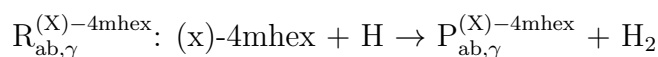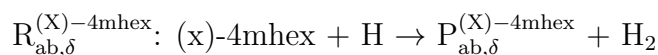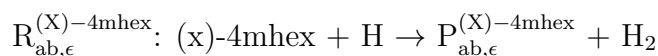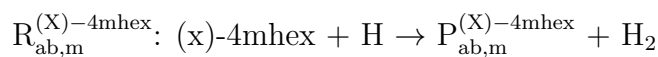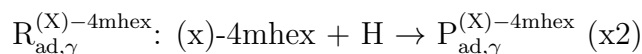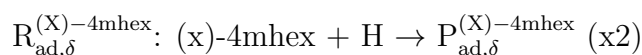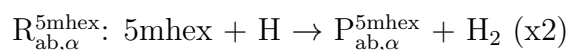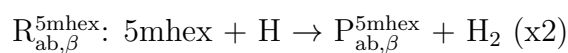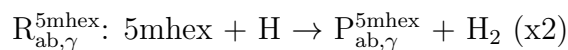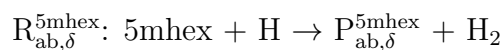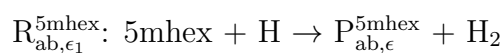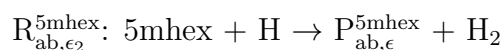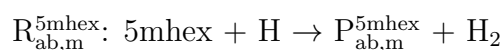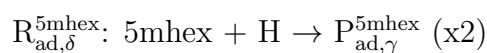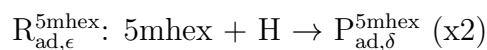

It is important to highlight that certain hydrogen abstraction reactions involving methylenic carbon sites are counted twice to reflect the presence of two configurational enantiomer transition states (*R* and *S*). Due to their energetic equivalence, only one of these pathways is included in the conformational analysis, and the corresponding rate constant is weighted by a factor of two. An exception to this treatment occurs for abstractions at the  $\epsilon$  carbon in 5mhex, where the associated transition states exhibit significant energetic differences and are therefore treated independently.

Similarly, hydrogen addition reactions are also counted twice to account for hydrogen atom attack occurring on either the same or the opposite face of the double bond. Nonetheless, only one of these pathways is incorporated into the reaction mechanism, with this symmetry incorporated into the calculation of the rate constants.

## S2. Conformational Search for Methyl (*Z*)- and (*E*)-hex-2-enoate

For methyl (*Z*)- and (*E*)-hex-2-enoate, two approaches were considered to account for the possible impact of the mesomeric effect between the double bond and the carbonyl group, which may restrict rotation around the adjacent dihedral angle (see Figure S1.). In the first approach, this torsion ( $\phi_2$ ) was excluded, while in the second, all four torsions were included, as shown in Figure S1. of the main text. As expected, the latter led to a larger number of conformers, including some low-energy structures not identified in the first approach, such as conf. 7 and conf. 3 for (*Z*)-2mhex and (*E*)-2mhex, respectively, as shown in the tables below. These results highlight the importance of accounting for  $\phi_2$ , as it can influence both thermodynamic and kinetic properties. Therefore, all subsequent analyses were based on the second approach.

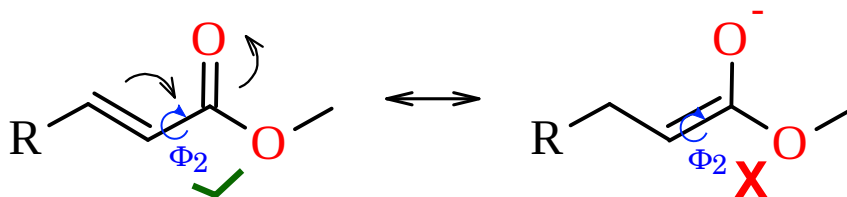

Fig. S1.: Representation of the mesomeric effect between the carbonyl group and the double bond in unsaturated esters.

All dihedral angles are reported in degrees ( $^{\circ}$ ), and energy differences are given in kcal/mol.

(*Z*)-2mhex (four torsion).

|   | angles          | conf    | weight | E     | E+ZPE |
|---|-----------------|---------|--------|-------|-------|
| 1 | 180_187_272_182 | TT-g-T- | 2      | 0.000 | 0.083 |
| 2 | 180_181_124_177 | TT-A+T+ | 2      | 0.066 | 0.000 |
| 3 | 180_184_253_068 | TT-A-G+ | 2      | 0.129 | 0.407 |
| 4 | 180_186_273_300 | TT-g-G- | 2      | 0.573 | 0.598 |
| 5 | 180_350_091_177 | TC-a+T+ | 2      | 1.652 | 1.799 |
| 6 | 180_000_180_180 | TCTT    | 1      | 1.693 | 1.388 |

|    |  |                 |  |          |  |   |  |       |  |       |
|----|--|-----------------|--|----------|--|---|--|-------|--|-------|
| 7  |  | 180_006_251_068 |  | TC+A-G+  |  | 2 |  | 1.814 |  | 2.077 |
| 8  |  | 180_352_090_059 |  | TC-g+G+  |  | 2 |  | 2.190 |  | 2.310 |
| 9  |  | 352_159_093_178 |  | C-T+a+T+ |  | 2 |  | 8.599 |  | 8.529 |
| 10 |  | 009_204_248_067 |  | C+T-A-G+ |  | 2 |  | 8.941 |  | 9.006 |
| 11 |  | 352_159_092_060 |  | C-T+a+G+ |  | 2 |  | 9.248 |  | 9.286 |

-----  
(E)-2mhex (four torsion).

|    |  | angles          |  | conf     |  | weight |  | E     |  | E+ZPE |
|----|--|-----------------|--|----------|--|--------|--|-------|--|-------|
| 1  |  | 180_180_000_180 |  | TTCT     |  | 1      |  | 0.000 |  | 0.000 |
| 2  |  | 180_180_121_178 |  | TTA+T+   |  | 2      |  | 0.058 |  | 0.031 |
| 3  |  | 180_180_123_295 |  | TTA+G-   |  | 2      |  | 0.218 |  | 0.199 |
| 4  |  | 180_000_000_180 |  | TCCT     |  | 1      |  | 0.681 |  | 0.729 |
| 5  |  | 180_000_121_178 |  | TCA+T+   |  | 2      |  | 0.697 |  | 0.666 |
| 6  |  | 180_180_119_063 |  | TTA+G+   |  | 2      |  | 0.710 |  | 0.848 |
| 7  |  | 180_180_351_288 |  | TTC-G-   |  | 2      |  | 0.848 |  | 1.001 |
| 8  |  | 180_000_123_295 |  | TCA+G-   |  | 2      |  | 0.872 |  | 0.867 |
| 9  |  | 180_000_241_297 |  | TCA-G-   |  | 2      |  | 1.362 |  | 1.501 |
| 10 |  | 180_000_009_072 |  | TCC+G+   |  | 2      |  | 1.539 |  | 1.699 |
| 11 |  | 000_180_000_180 |  | CTCT     |  | 1      |  | 8.964 |  | 8.873 |
| 12 |  | 000_179_122_178 |  | CT+A+T+  |  | 2      |  | 9.039 |  | 8.991 |
| 13 |  | 000_181_123_296 |  | CT-A+G-  |  | 2      |  | 9.175 |  | 9.123 |
| 14 |  | 000_180_119_063 |  | CTA+G+   |  | 2      |  | 9.689 |  | 9.737 |
| 15 |  | 001_182_009_072 |  | C+T-C+G+ |  | 2      |  | 9.870 |  | 9.989 |

-----  
(Z)-2mhex (three torsion).

|   |  | angles      |  | conf   |  | weight |  | E     |  | E+ZPE |
|---|--|-------------|--|--------|--|--------|--|-------|--|-------|
| 1 |  | 180_272_182 |  | Tg-T-  |  | 2      |  | 0.000 |  | 0.083 |
| 2 |  | 180_124_177 |  | TA+T+  |  | 2      |  | 0.066 |  | 0.000 |
| 3 |  | 180_253_068 |  | TA-G+  |  | 2      |  | 0.129 |  | 0.407 |
| 4 |  | 180_273_300 |  | Tg-G-  |  | 2      |  | 0.573 |  | 0.598 |
| 5 |  | 352_093_178 |  | C-a+T+ |  | 2      |  | 8.599 |  | 8.529 |

|   |  |             |  |        |  |   |  |       |  |       |
|---|--|-------------|--|--------|--|---|--|-------|--|-------|
| 6 |  | 009_248_067 |  | C+A-G+ |  | 2 |  | 8.941 |  | 9.006 |
| 7 |  | 352_092_060 |  | C-a+G+ |  | 2 |  | 9.248 |  | 9.286 |

-----

(E)-2mhex (three torsion).

|   |  | angles      |  | conf  |  | weight |  | E     |  | E+ZPE |
|---|--|-------------|--|-------|--|--------|--|-------|--|-------|
| 1 |  | 180_000_180 |  | TCT   |  | 1      |  | 0.000 |  | 0.063 |
| 2 |  | 180_121_178 |  | TA+T+ |  | 2      |  | 0.015 |  | 0.000 |
| 3 |  | 180_123_295 |  | TA+G- |  | 2      |  | 0.190 |  | 0.200 |
| 4 |  | 180_241_297 |  | TA-G- |  | 2      |  | 0.681 |  | 0.835 |
| 5 |  | 180_009_072 |  | TC+G+ |  | 2      |  | 0.858 |  | 1.033 |

### S3. Nomenclature IUPAC - Dihedral Angles

- C  $\Rightarrow \phi_i = 0^\circ$
- C-  $\Rightarrow \phi_i \in (-30^\circ, 0^\circ) \Leftrightarrow$  C+  $\Rightarrow \phi_i \in (0^\circ, +30^\circ)$ ;
- G-  $\Rightarrow \phi_i \in (-75^\circ, -30^\circ) \Leftrightarrow$  G+  $\Rightarrow \phi_i \in (+30^\circ, +75^\circ)$ ;
- g-  $\Rightarrow \phi_i \in (-90^\circ, -75^\circ) \Leftrightarrow$  g+  $\Rightarrow \phi_i \in (+75^\circ, +90^\circ)$ ;
- a-  $\Rightarrow \phi_i \in (-105^\circ, -90^\circ) \Leftrightarrow$  a+  $\Rightarrow \phi_i \in (+90^\circ, +105^\circ)$ ;
- A-  $\Rightarrow \phi_i \in (-150^\circ, -105^\circ) \Leftrightarrow$  A+  $\Rightarrow \phi_i \in (+105^\circ, +150^\circ)$ ;
- T-  $\Rightarrow \phi_i \in (-180^\circ, -105^\circ) \Leftrightarrow$  T+  $\Rightarrow \phi_i \in (+150^\circ, +180^\circ)$ ;
- T  $\Rightarrow \phi_i = 180^\circ$ .

### S4. Partition Functions of the Isomers

|         | (Z)-2mhex<br>SS-QH | (E)-2mhex<br>SS-QH | (Z)-3mhex<br>SS-QH | (E)-3mhex<br>SS-QH |
|---------|--------------------|--------------------|--------------------|--------------------|
| 250.00  | 3.2399E-089        | 5.0011E-089        | 6.1732E-088        | 4.0820E-088        |
| 300.00  | 2.6481E-072        | 3.7974E-072        | 4.5406E-071        | 2.9077E-071        |
| 400.00  | 1.0867E-050        | 1.4300E-050        | 1.6522E-049        | 1.0202E-049        |
| 500.00  | 3.1408E-037        | 3.9391E-037        | 4.4826E-036        | 2.7116E-036        |
| 600.00  | 7.3886E-028        | 8.9873E-028        | 1.0158E-026        | 6.0637E-027        |
| 700.00  | 7.7350E-021        | 9.2131E-021        | 1.0384E-019        | 6.1402E-020        |
| 800.00  | 2.6565E-015        | 3.1164E-015        | 3.5087E-014        | 2.0604E-014        |
| 900.00  | 9.0790E-011        | 1.0531E-010        | 1.1854E-009        | 6.9243E-010        |
| 1000.00 | 6.0162E-007        | 6.9175E-007        | 7.7887E-006        | 4.5307E-006        |
| 1100.00 | 1.1833E-003        | 1.3512E-003        | 1.5220E-002        | 8.8246E-003        |
| 1200.00 | 9.1875E-001        | 1.0434E+000        | 1.1759E+001        | 6.7995E+000        |
| 1300.00 | 3.4352E+002        | 3.8840E+002        | 4.3793E+003        | 2.5268E+003        |
| 1400.00 | 7.1364E+004        | 8.0393E+004        | 9.0686E+005        | 5.2230E+005        |
| 1500.00 | 9.1566E+006        | 1.0284E+007        | 1.1605E+008        | 6.6740E+007        |
| 1600.00 | 7.8624E+008        | 8.8078E+008        | 9.9436E+009        | 5.7111E+009        |
| 1700.00 | 4.8071E+010        | 5.3735E+010        | 6.0686E+011        | 3.4817E+011        |

|         |             |             |             |             |
|---------|-------------|-------------|-------------|-------------|
| 1800.00 | 2.1976E+012 | 2.4520E+012 | 2.7701E+013 | 1.5878E+013 |
| 1900.00 | 7.8117E+013 | 8.7024E+013 | 9.8338E+014 | 5.6322E+014 |
| 2000.00 | 2.2288E+015 | 2.4795E+015 | 2.8026E+016 | 1.6041E+016 |

| T(K)    | (Z)-4mhex   |  | (E)-4mhex   |             |
|---------|-------------|--|-------------|-------------|
|         | SS-QH       |  | SS-QH       |             |
| 250.00  | 8.6973E-089 |  | 1.7374E-088 | 8.2370E-089 |
| 300.00  | 6.6032E-072 |  | 1.2344E-071 | 6.2221E-072 |
| 400.00  | 2.4866E-050 |  | 4.3121E-050 | 2.3089E-050 |
| 500.00  | 6.8658E-037 |  | 1.1425E-036 | 6.2954E-037 |
| 600.00  | 1.5723E-027 |  | 2.5493E-027 | 1.4286E-027 |
| 700.00  | 1.6182E-020 |  | 2.5776E-020 | 1.4612E-020 |
| 800.00  | 5.4940E-015 |  | 8.6406E-015 | 4.9398E-015 |
| 900.00  | 1.8627E-010 |  | 2.9017E-010 | 1.6698E-010 |
| 1000.00 | 1.2271E-006 |  | 1.8976E-006 | 1.0977E-006 |
| 1100.00 | 2.4029E-003 |  | 3.6945E-003 | 2.1461E-003 |
| 1200.00 | 1.8594E+000 |  | 2.8458E+000 | 1.6588E+000 |
| 1300.00 | 6.9340E+002 |  | 1.0573E+003 | 6.1807E+002 |
| 1400.00 | 1.4374E+005 |  | 2.1851E+005 | 1.2804E+005 |
| 1500.00 | 1.8411E+007 |  | 2.7917E+007 | 1.6392E+007 |
| 1600.00 | 1.5787E+009 |  | 2.3886E+009 | 1.4050E+009 |
| 1700.00 | 9.6405E+010 |  | 1.4561E+011 | 8.5770E+010 |
| 1800.00 | 4.4028E+012 |  | 6.6397E+012 | 3.9161E+012 |
| 1900.00 | 1.5637E+014 |  | 2.3551E+014 | 1.3906E+014 |
| 2000.00 | 4.4583E+015 |  | 6.7069E+015 | 3.9639E+015 |

|         | (Z)-2mhex   |             | (E)-2mhex   |             |
|---------|-------------|-------------|-------------|-------------|
|         | MS-QH       | or MS-T     | MS-QH       | or MS-T     |
| 250.00  | 3.9596E-088 | 3.3128E-088 | 4.8080E-088 | 3.3194E-088 |
| 300.00  | 3.3965E-071 | 2.9715E-071 | 4.1688E-071 | 3.0391E-071 |
| 400.00  | 1.5175E-049 | 1.4083E-049 | 1.9013E-049 | 1.5193E-049 |
| 500.00  | 4.7070E-036 | 4.5018E-036 | 5.9656E-036 | 5.1071E-036 |
| 600.00  | 1.1739E-026 | 1.1343E-026 | 1.4951E-026 | 1.3435E-026 |
| 700.00  | 1.2903E-019 | 1.2425E-019 | 1.6455E-019 | 1.5256E-019 |
| 800.00  | 4.6174E-014 | 4.3881E-014 | 5.8874E-014 | 5.5516E-014 |
| 900.00  | 1.6349E-009 | 1.5227E-009 | 2.0829E-009 | 1.9748E-009 |
| 1000.00 | 1.1172E-005 | 1.0147E-005 | 1.4223E-005 | 1.3432E-005 |
| 1100.00 | 2.2579E-002 | 1.9924E-002 | 2.8733E-002 | 2.6824E-002 |
| 1200.00 | 1.7962E+001 | 1.5358E+001 | 2.2859E+001 | 2.0965E+001 |
| 1300.00 | 6.8647E+003 | 5.6757E+003 | 8.7411E+003 | 7.8361E+003 |
| 1400.00 | 1.4548E+006 | 1.1613E+006 | 1.8543E+006 | 1.6181E+006 |
| 1500.00 | 1.9009E+008 | 1.4635E+008 | 2.4266E+008 | 2.0540E+008 |
| 1600.00 | 1.6599E+010 | 1.2315E+010 | 2.1228E+010 | 1.7381E+010 |
| 1700.00 | 1.0308E+012 | 7.3651E+011 | 1.3210E+012 | 1.0439E+012 |
| 1800.00 | 4.7809E+013 | 3.2885E+013 | 6.1420E+013 | 4.6751E+013 |
| 1900.00 | 1.7226E+015 | 1.1403E+015 | 2.2188E+015 | 1.6243E+015 |
| 2000.00 | 4.9773E+016 | 3.1702E+016 | 6.4288E+016 | 4.5211E+016 |

|         | (Z)-3mhex   |             | (E)-3mhex   |             |
|---------|-------------|-------------|-------------|-------------|
|         | MS-QH       | or MS-T     | MS-QH       | or MS-T     |
| 250.00  | 2.1126E-087 | 2.0339E-087 | 2.9395E-087 | 2.3167E-087 |
| 300.00  | 1.7257E-070 | 1.7327E-070 | 2.2194E-070 | 1.8376E-070 |
| 400.00  | 7.2934E-049 | 7.5801E-049 | 8.4646E-049 | 7.5040E-049 |
| 500.00  | 2.1863E-035 | 2.2498E-035 | 2.3827E-035 | 2.1860E-035 |
| 600.00  | 5.3188E-026 | 5.2738E-026 | 5.5583E-026 | 5.1404E-026 |
| 700.00  | 5.7347E-019 | 5.3892E-019 | 5.8172E-019 | 5.3182E-019 |
| 800.00  | 2.0209E-013 | 1.7826E-013 | 2.0056E-013 | 1.7872E-013 |
| 900.00  | 7.0660E-009 | 5.8182E-009 | 6.8978E-009 | 5.9315E-009 |
| 1000.00 | 4.7788E-005 | 3.6629E-005 | 4.6071E-005 | 3.7958E-005 |
| 1100.00 | 9.5747E-002 | 6.8238E-002 | 9.1435E-002 | 7.1814E-002 |
| 1200.00 | 7.5618E+001 | 5.0103E+001 | 7.1700E+001 | 5.3490E+001 |
| 1300.00 | 2.8723E+004 | 1.7703E+004 | 2.7092E+004 | 1.9149E+004 |
| 1400.00 | 6.0553E+006 | 3.4747E+006 | 5.6904E+006 | 3.8040E+006 |
| 1500.00 | 7.8775E+008 | 4.2134E+008 | 7.3843E+008 | 4.6632E+008 |
| 1600.00 | 6.8525E+010 | 3.4208E+010 | 6.4140E+010 | 3.8234E+010 |
| 1700.00 | 4.2415E+012 | 1.9789E+012 | 3.9674E+012 | 2.2314E+012 |
| 1800.00 | 1.9618E+014 | 8.5659E+013 | 1.8350E+014 | 9.7360E+013 |
| 1900.00 | 7.0511E+015 | 2.8854E+015 | 6.5990E+015 | 3.3029E+015 |
| 2000.00 | 2.0331E+017 | 7.8077E+016 | 1.9046E+017 | 8.9945E+016 |

|        | (Z)-4mhex   |             | (E)-4mhex   |             |
|--------|-------------|-------------|-------------|-------------|
|        | MS-QH       | or MS-T     | MS-QH       | or MS-T     |
| 250.00 | 1.2765E-087 | 1.3586E-087 | 1.6795E-087 | 1.4541E-087 |

|         |             |             |             |             |
|---------|-------------|-------------|-------------|-------------|
| 300.00  | 1.1133E-070 | 1.2173E-070 | 1.3465E-070 | 1.2138E-070 |
| 400.00  | 5.2009E-049 | 5.6744E-049 | 5.6769E-049 | 5.3602E-049 |
| 500.00  | 1.6778E-035 | 1.7506E-035 | 1.7205E-035 | 1.6450E-035 |
| 600.00  | 4.3137E-026 | 4.2136E-026 | 4.2388E-026 | 4.0094E-026 |
| 700.00  | 4.8536E-019 | 4.3916E-019 | 4.6233E-019 | 4.2587E-019 |
| 800.00  | 1.7690E-013 | 1.4757E-013 | 1.6459E-013 | 1.4609E-013 |
| 900.00  | 6.3555E-009 | 4.8811E-009 | 5.8068E-009 | 4.9315E-009 |
| 1000.00 | 4.3955E-005 | 3.1089E-005 | 3.9589E-005 | 3.2016E-005 |
| 1100.00 | 8.9735E-002 | 5.8520E-002 | 7.9902E-002 | 6.1337E-002 |
| 1200.00 | 7.2010E+001 | 4.3375E+001 | 6.3531E+001 | 4.6195E+001 |
| 1300.00 | 2.7732E+004 | 1.5459E+004 | 2.4284E+004 | 1.6703E+004 |
| 1400.00 | 5.9171E+006 | 3.0587E+006 | 5.1500E+006 | 3.3477E+006 |
| 1500.00 | 7.7798E+008 | 3.7366E+008 | 6.7375E+008 | 4.1370E+008 |
| 1600.00 | 6.8318E+010 | 3.0547E+010 | 5.8923E+010 | 3.4170E+010 |
| 1700.00 | 4.2647E+012 | 1.7785E+012 | 3.6658E+012 | 2.0078E+012 |
| 1800.00 | 1.9877E+014 | 7.7445E+013 | 1.7038E+014 | 8.8149E+013 |
| 1900.00 | 7.1944E+015 | 2.6233E+015 | 6.1525E+015 | 3.0077E+015 |
| 2000.00 | 2.0877E+017 | 7.1353E+016 | 1.7820E+017 | 8.2345E+016 |

#### 5mhex

|         | MS-QH       | or | MS-T        |
|---------|-------------|----|-------------|
| 250.00  | 1.2864E-087 |    | 1.1262E-087 |
| 300.00  | 1.1956E-070 |    | 1.0759E-070 |
| 400.00  | 6.0827E-049 |    | 5.6332E-049 |
| 500.00  | 2.0709E-035 |    | 1.9275E-035 |
| 600.00  | 5.5278E-026 |    | 5.0892E-026 |
| 700.00  | 6.3955E-019 |    | 5.7597E-019 |
| 800.00  | 2.3821E-013 |    | 2.0822E-013 |
| 900.00  | 8.7093E-009 |    | 7.3475E-009 |
| 1000.00 | 6.1106E-005 |    | 4.9557E-005 |
| 1100.00 | 1.2625E-001 |    | 9.8142E-002 |
| 1200.00 | 1.0235E+002 |    | 7.6096E+001 |
| 1300.00 | 3.9761E+004 |    | 2.8230E+004 |
| 1400.00 | 8.5480E+006 |    | 5.7893E+006 |
| 1500.00 | 1.1313E+009 |    | 7.3028E+008 |
| 1600.00 | 9.9914E+010 |    | 6.1446E+010 |
| 1700.00 | 6.2687E+012 |    | 3.6716E+012 |
| 1800.00 | 2.9348E+014 |    | 1.6369E+014 |
| 1900.00 | 1.0665E+016 |    | 5.6641E+015 |
| 2000.00 | 3.1059E+017 |    | 1.5709E+017 |

## S5. Multistructural Factors

### S5.1. (Z)-2mhex

| T (K)   | (Z)-2mhex |       | Alpha-site(abs) |       | Beta-site (abs) |       |
|---------|-----------|-------|-----------------|-------|-----------------|-------|
|         | MS-T      | MS-QH | MS-T            | MS-QH | MS-T            | MS-QH |
| 250.00  | 10.23     | 12.22 | 1.57            | 2.13  | 8.25            | 9.54  |
| 300.00  | 11.22     | 12.83 | 1.67            | 2.20  | 8.98            | 9.83  |
| 400.00  | 12.96     | 13.97 | 1.86            | 2.36  | 10.24           | 10.39 |
| 500.00  | 14.33     | 14.99 | 2.00            | 2.53  | 11.23           | 10.87 |
| 600.00  | 15.35     | 15.89 | 2.11            | 2.69  | 11.95           | 11.28 |
| 700.00  | 16.06     | 16.68 | 2.20            | 2.84  | 12.43           | 11.63 |
| 800.00  | 16.52     | 17.38 | 2.25            | 2.98  | 12.74           | 11.94 |
| 900.00  | 16.77     | 18.01 | 2.28            | 3.11  | 12.89           | 12.22 |
| 1000.00 | 16.87     | 18.57 | 2.29            | 3.24  | 12.94           | 12.47 |
| 1100.00 | 16.84     | 19.08 | 2.29            | 3.35  | 12.90           | 12.71 |
| 1200.00 | 16.72     | 19.55 | 2.27            | 3.46  | 12.79           | 12.93 |
| 1300.00 | 16.52     | 19.98 | 2.25            | 3.56  | 12.64           | 13.14 |
| 1400.00 | 16.27     | 20.39 | 2.21            | 3.66  | 12.45           | 13.34 |
| 1500.00 | 15.98     | 20.76 | 2.18            | 3.75  | 12.24           | 13.53 |
| 1600.00 | 15.66     | 21.11 | 2.13            | 3.84  | 12.00           | 13.71 |
| 1700.00 | 15.32     | 21.44 | 2.09            | 3.92  | 11.75           | 13.89 |
| 1800.00 | 14.96     | 21.76 | 2.04            | 4.00  | 11.49           | 14.06 |
| 1900.00 | 14.60     | 22.05 | 1.99            | 4.07  | 11.22           | 14.23 |
| 2000.00 | 14.22     | 22.33 | 1.94            | 4.14  | 10.95           | 14.39 |

| T (K)  | Gamma-site (abs) |       | Delta-site (abs) |       | Methyl-site (abs) |       |
|--------|------------------|-------|------------------|-------|-------------------|-------|
|        | MS-T             | MS-QH | MS-T             | MS-QH | MS-T              | MS-QH |
| 250.00 | 1.71             | 2.30  | 14.01            | 15.87 | 14.61             | 22.27 |

|         |      |      |       |       |       |       |
|---------|------|------|-------|-------|-------|-------|
| 300.00  | 1.97 | 2.55 | 15.61 | 16.65 | 15.55 | 22.53 |
| 400.00  | 2.50 | 3.03 | 18.16 | 17.89 | 17.39 | 23.04 |
| 500.00  | 3.01 | 3.48 | 19.90 | 18.82 | 19.05 | 23.48 |
| 600.00  | 3.48 | 3.89 | 20.98 | 19.53 | 20.44 | 23.88 |
| 700.00  | 3.88 | 4.27 | 21.57 | 20.11 | 21.55 | 24.23 |
| 800.00  | 4.22 | 4.61 | 21.81 | 20.59 | 22.39 | 24.57 |
| 900.00  | 4.50 | 4.92 | 21.79 | 21.02 | 22.99 | 24.90 |
| 1000.00 | 4.72 | 5.21 | 21.60 | 21.41 | 23.40 | 25.22 |
| 1100.00 | 4.88 | 5.47 | 21.29 | 21.77 | 23.63 | 25.54 |
| 1200.00 | 5.00 | 5.72 | 20.91 | 22.12 | 23.74 | 25.86 |
| 1300.00 | 5.09 | 5.95 | 20.47 | 22.45 | 23.73 | 26.18 |
| 1400.00 | 5.14 | 6.17 | 20.00 | 22.78 | 23.63 | 26.50 |
| 1500.00 | 5.16 | 6.37 | 19.52 | 23.10 | 23.47 | 26.82 |
| 1600.00 | 5.16 | 6.56 | 19.03 | 23.41 | 23.25 | 27.14 |
| 1700.00 | 5.13 | 6.75 | 18.53 | 23.72 | 22.98 | 27.45 |
| 1800.00 | 5.10 | 6.93 | 18.04 | 24.02 | 22.68 | 27.76 |
| 1900.00 | 5.05 | 7.09 | 17.55 | 24.31 | 22.35 | 28.06 |
| 2000.00 | 4.98 | 7.26 | 17.08 | 24.60 | 22.00 | 28.36 |

| T (K)   | Epsilon-site (abs) |       | Alpha-site (add) |       | Beta-site (add) |       |
|---------|--------------------|-------|------------------|-------|-----------------|-------|
|         | MS-T               | MS-QH | MS-T             | MS-QH | MS-T            | MS-QH |
| 250.00  | 9.02               | 13.13 | 4.99             | 5.72  | 5.35            | 5.99  |
| 300.00  | 11.34              | 15.50 | 5.73             | 6.27  | 5.90            | 6.27  |
| 400.00  | 15.62              | 19.32 | 7.18             | 7.31  | 7.08            | 6.95  |
| 500.00  | 19.20              | 22.24 | 8.52             | 8.25  | 8.22            | 7.65  |
| 600.00  | 22.03              | 24.53 | 9.69             | 9.08  | 9.23            | 8.31  |
| 700.00  | 24.18              | 26.38 | 10.66            | 9.83  | 10.09           | 8.92  |
| 800.00  | 25.73              | 27.91 | 11.46            | 10.48 | 10.79           | 9.48  |
| 900.00  | 26.79              | 29.20 | 12.08            | 11.07 | 11.35           | 9.99  |
| 1000.00 | 27.45              | 30.31 | 12.56            | 11.60 | 11.77           | 10.46 |
| 1100.00 | 27.80              | 31.27 | 12.91            | 12.08 | 12.08           | 10.89 |
| 1200.00 | 27.89              | 32.11 | 13.15            | 12.52 | 12.29           | 11.30 |
| 1300.00 | 27.78              | 32.87 | 13.29            | 12.92 | 12.41           | 11.69 |
| 1400.00 | 27.52              | 33.54 | 13.35            | 13.29 | 12.47           | 12.06 |
| 1500.00 | 27.15              | 34.16 | 13.35            | 13.63 | 12.46           | 12.41 |
| 1600.00 | 26.68              | 34.72 | 13.29            | 13.95 | 12.41           | 12.74 |
| 1700.00 | 26.15              | 35.23 | 13.18            | 14.25 | 12.31           | 13.06 |
| 1800.00 | 25.57              | 35.70 | 13.03            | 14.53 | 12.18           | 13.36 |
| 1900.00 | 24.95              | 36.14 | 12.86            | 14.79 | 12.02           | 13.65 |
| 2000.00 | 24.32              | 36.55 | 12.65            | 15.04 | 11.83           | 13.93 |

## S5.2. (E)-2mhex

| T (K)   | (E)-2mhex |       | Alpha-site (abs) |       | Beta-site (abs) |       | Gamma-site (abs) |       | Delta-site (abs) |       |
|---------|-----------|-------|------------------|-------|-----------------|-------|------------------|-------|------------------|-------|
|         | MS-T      | MS-QH | MS-T             | MS-QH | MS-T            | MS-QH | MS-T             | MS-QH | MS-T             | MS-QH |
| 250.00  | 6.64      | 9.61  | 3.48             | 4.73  | 6.38            | 10.36 | 3.10             | 4.17  | 2.87             | 4.12  |
| 300.00  | 8.00      | 10.98 | 4.15             | 5.27  | 7.42            | 11.37 | 3.56             | 4.59  | 3.51             | 4.74  |
| 400.00  | 10.62     | 13.30 | 5.45             | 6.29  | 9.27            | 12.91 | 4.40             | 5.28  | 4.71             | 5.81  |
| 500.00  | 12.97     | 15.15 | 6.60             | 7.20  | 10.79           | 14.01 | 5.13             | 5.83  | 5.75             | 6.66  |
| 600.00  | 14.95     | 16.64 | 7.50             | 7.98  | 11.96           | 14.84 | 5.77             | 6.28  | 6.60             | 7.36  |
| 700.00  | 16.56     | 17.86 | 8.18             | 8.66  | 12.82           | 15.49 | 6.30             | 6.64  | 7.26             | 7.93  |
| 800.00  | 17.81     | 18.89 | 8.64             | 9.25  | 13.40           | 16.03 | 6.74             | 6.95  | 7.75             | 8.42  |
| 900.00  | 18.75     | 19.78 | 8.92             | 9.78  | 13.77           | 16.48 | 7.10             | 7.21  | 8.10             | 8.84  |
| 1000.00 | 19.42     | 20.56 | 9.06             | 10.24 | 13.95           | 16.88 | 7.39             | 7.44  | 8.32             | 9.21  |
| 1100.00 | 19.85     | 21.27 | 9.10             | 10.65 | 14.00           | 17.25 | 7.61             | 7.65  | 8.44             | 9.55  |
| 1200.00 | 20.09     | 21.91 | 9.05             | 11.02 | 13.94           | 17.59 | 7.77             | 7.84  | 8.48             | 9.85  |
| 1300.00 | 20.18     | 22.51 | 8.94             | 11.36 | 13.80           | 17.91 | 7.87             | 8.02  | 8.46             | 10.13 |
| 1400.00 | 20.13     | 23.07 | 8.78             | 11.67 | 13.59           | 18.23 | 7.94             | 8.19  | 8.39             | 10.39 |
| 1500.00 | 19.97     | 23.60 | 8.59             | 11.95 | 13.34           | 18.53 | 7.96             | 8.34  | 8.28             | 10.64 |
| 1600.00 | 19.73     | 24.10 | 8.37             | 12.21 | 13.05           | 18.82 | 7.95             | 8.49  | 8.14             | 10.87 |
| 1700.00 | 19.43     | 24.58 | 8.13             | 12.46 | 12.74           | 19.11 | 7.91             | 8.64  | 7.98             | 11.09 |
| 1800.00 | 19.07     | 25.05 | 7.88             | 12.68 | 12.41           | 19.39 | 7.85             | 8.78  | 7.79             | 11.30 |
| 1900.00 | 18.67     | 25.50 | 7.63             | 12.90 | 12.07           | 19.67 | 7.76             | 8.91  | 7.60             | 11.50 |
| 2000.00 | 18.23     | 25.93 | 7.38             | 13.09 | 11.72           | 19.94 | 7.66             | 9.04  | 7.40             | 11.70 |

| T (K)  | Methyl-site (abs) |       | Epsilon-site (abs) |       | Alpha-site (add) |       | Beta-site (add) |       |
|--------|-------------------|-------|--------------------|-------|------------------|-------|-----------------|-------|
|        | MS-T              | MS-QH | MS-T               | MS-QH | MS-T             | MS-QH | MS-T            | MS-QH |
| 250.00 | 8.03              | 14.37 | 13.21              | 20.28 | 3.12             | 4.66  | 4.45            | 6.42  |
| 300.00 | 9.78              | 16.59 | 16.15              | 23.53 | 3.62             | 5.12  | 5.40            | 7.36  |
| 400.00 | 13.43             | 20.41 | 21.92              | 29.21 | 4.56             | 5.92  | 7.24            | 8.98  |
| 500.00 | 17.13             | 23.50 | 27.25              | 33.86 | 5.37             | 6.58  | 8.87            | 10.29 |

|         |       |       |       |       |      |       |       |       |
|---------|-------|-------|-------|-------|------|-------|-------|-------|
| 600.00  | 20.69 | 26.00 | 31.90 | 37.68 | 6.06 | 7.11  | 10.25 | 11.37 |
| 700.00  | 23.97 | 28.06 | 35.79 | 40.85 | 6.60 | 7.55  | 11.37 | 12.27 |
| 800.00  | 26.88 | 29.80 | 38.91 | 43.54 | 7.03 | 7.92  | 12.25 | 13.03 |
| 900.00  | 29.39 | 31.29 | 41.32 | 45.86 | 7.36 | 8.24  | 12.92 | 13.69 |
| 1000.00 | 31.49 | 32.59 | 43.10 | 47.90 | 7.59 | 8.52  | 13.40 | 14.28 |
| 1100.00 | 33.19 | 33.74 | 44.32 | 49.73 | 7.75 | 8.77  | 13.72 | 14.81 |
| 1200.00 | 34.52 | 34.77 | 45.08 | 51.40 | 7.84 | 9.00  | 13.91 | 15.30 |
| 1300.00 | 35.50 | 35.71 | 45.45 | 52.94 | 7.87 | 9.20  | 13.99 | 15.75 |
| 1400.00 | 36.18 | 36.57 | 45.49 | 54.37 | 7.87 | 9.39  | 13.98 | 16.17 |
| 1500.00 | 36.58 | 37.37 | 45.27 | 55.72 | 7.82 | 9.56  | 13.90 | 16.57 |
| 1600.00 | 36.76 | 38.11 | 44.83 | 56.99 | 7.74 | 9.72  | 13.76 | 16.95 |
| 1700.00 | 36.73 | 38.80 | 44.22 | 58.20 | 7.64 | 9.87  | 13.57 | 17.32 |
| 1800.00 | 36.54 | 39.45 | 43.47 | 59.36 | 7.51 | 10.01 | 13.34 | 17.67 |
| 1900.00 | 36.20 | 40.06 | 42.62 | 60.47 | 7.37 | 10.15 | 13.09 | 18.00 |
| 2000.00 | 35.75 | 40.64 | 41.69 | 61.53 | 7.22 | 10.28 | 12.81 | 18.33 |

### S5.3. (Z)-3mhex

| T (K)   | (Z)-3mhex |       | Alpha-site (abs) |       | Beta-site (abs) |       | Gamma-site (abs) |       | Delta-site (abs) |       |
|---------|-----------|-------|------------------|-------|-----------------|-------|------------------|-------|------------------|-------|
|         | MS-T      | MS-QH | MS-T             | MS-QH | MS-T            | MS-QH | MS-T             | MS-QH | MS-T             | MS-QH |
| 250.00  | 3.30      | 3.42  | 1.96             | 2.15  | 32.34           | 31.50 | 3.74             | 4.08  | 1.42             | 1.67  |
| 300.00  | 3.82      | 3.80  | 2.26             | 2.32  | 38.00           | 35.42 | 4.28             | 4.37  | 1.76             | 1.91  |
| 400.00  | 4.59      | 4.41  | 2.83             | 2.61  | 45.95           | 41.51 | 5.10             | 4.80  | 2.35             | 2.35  |
| 500.00  | 5.02      | 4.88  | 3.31             | 2.85  | 50.17           | 46.03 | 5.59             | 5.09  | 2.79             | 2.72  |
| 600.00  | 5.19      | 5.24  | 3.69             | 3.05  | 51.79           | 49.56 | 5.80             | 5.31  | 3.06             | 3.03  |
| 700.00  | 5.19      | 5.52  | 3.96             | 3.23  | 51.72           | 52.40 | 5.83             | 5.49  | 3.20             | 3.29  |
| 800.00  | 5.08      | 5.76  | 4.13             | 3.39  | 50.65           | 54.77 | 5.73             | 5.62  | 3.24             | 3.51  |
| 900.00  | 4.91      | 5.96  | 4.23             | 3.53  | 49.01           | 56.79 | 5.55             | 5.74  | 3.22             | 3.70  |
| 1000.00 | 4.70      | 6.14  | 4.26             | 3.66  | 47.07           | 58.56 | 5.33             | 5.84  | 3.16             | 3.87  |
| 1100.00 | 4.48      | 6.29  | 4.24             | 3.78  | 45.01           | 60.15 | 5.08             | 5.93  | 3.07             | 4.02  |
| 1200.00 | 4.26      | 6.43  | 4.19             | 3.89  | 42.92           | 61.58 | 4.83             | 6.01  | 2.97             | 4.16  |
| 1300.00 | 4.04      | 6.56  | 4.11             | 3.99  | 40.87           | 62.90 | 4.59             | 6.09  | 2.86             | 4.29  |
| 1400.00 | 3.83      | 6.68  | 4.02             | 4.08  | 38.90           | 64.13 | 4.35             | 6.16  | 2.75             | 4.40  |
| 1500.00 | 3.63      | 6.79  | 3.91             | 4.17  | 37.01           | 65.27 | 4.12             | 6.22  | 2.64             | 4.51  |
| 1600.00 | 3.44      | 6.89  | 3.80             | 4.26  | 35.21           | 66.35 | 3.90             | 6.29  | 2.53             | 4.61  |
| 1700.00 | 3.26      | 6.99  | 3.68             | 4.34  | 33.51           | 67.37 | 3.70             | 6.35  | 2.42             | 4.70  |
| 1800.00 | 3.09      | 7.08  | 3.56             | 4.42  | 31.91           | 68.34 | 3.50             | 6.40  | 2.32             | 4.79  |
| 1900.00 | 2.93      | 7.17  | 3.45             | 4.49  | 30.40           | 69.26 | 3.32             | 6.46  | 2.22             | 4.88  |
| 2000.00 | 2.79      | 7.25  | 3.33             | 4.56  | 28.98           | 70.14 | 3.15             | 6.51  | 2.13             | 4.96  |

| T (K)   | Methyl-site (abs) |       | Epsilon-site (abs) |       | Beta-site (add) |       | Gamma-site (add) |       |
|---------|-------------------|-------|--------------------|-------|-----------------|-------|------------------|-------|
|         | MS-T              | MS-QH | MS-T               | MS-QH | MS-T            | MS-QH | MS-T             | MS-QH |
| 250.00  | 6.68              | 8.58  | 5.19               | 5.98  | 2.60            | 2.99  | 2.34             | 2.74  |
| 300.00  | 7.92              | 9.57  | 6.19               | 6.79  | 2.99            | 3.26  | 2.60             | 2.94  |
| 400.00  | 10.03             | 11.12 | 7.75               | 8.11  | 3.61            | 3.73  | 3.06             | 3.34  |
| 500.00  | 11.55             | 12.27 | 8.73               | 9.10  | 4.03            | 4.11  | 3.39             | 3.69  |
| 600.00  | 12.52             | 13.13 | 9.25               | 9.87  | 4.27            | 4.42  | 3.59             | 3.98  |
| 700.00  | 13.05             | 13.80 | 9.44               | 10.48 | 4.39            | 4.68  | 3.69             | 4.22  |
| 800.00  | 13.24             | 14.34 | 9.42               | 10.98 | 4.43            | 4.90  | 3.71             | 4.44  |
| 900.00  | 13.18             | 14.79 | 9.26               | 11.40 | 4.40            | 5.10  | 3.68             | 4.62  |
| 1000.00 | 12.95             | 15.16 | 9.02               | 11.76 | 4.33            | 5.28  | 3.62             | 4.78  |
| 1100.00 | 12.61             | 15.49 | 8.74               | 12.08 | 4.24            | 5.44  | 3.53             | 4.92  |
| 1200.00 | 12.20             | 15.77 | 8.42               | 12.37 | 4.14            | 5.59  | 3.42             | 5.05  |
| 1300.00 | 11.74             | 16.01 | 8.10               | 12.64 | 4.02            | 5.73  | 3.30             | 5.17  |
| 1400.00 | 11.26             | 16.24 | 7.77               | 12.88 | 3.90            | 5.86  | 3.18             | 5.28  |
| 1500.00 | 10.77             | 16.44 | 7.45               | 13.11 | 3.78            | 5.99  | 3.06             | 5.39  |
| 1600.00 | 10.28             | 16.62 | 7.14               | 13.32 | 3.65            | 6.12  | 2.94             | 5.48  |
| 1700.00 | 9.81              | 16.78 | 6.84               | 13.52 | 3.53            | 6.24  | 2.82             | 5.57  |
| 1800.00 | 9.34              | 16.94 | 6.54               | 13.71 | 3.40            | 6.35  | 2.71             | 5.66  |
| 1900.00 | 8.90              | 17.08 | 6.26               | 13.89 | 3.28            | 6.46  | 2.59             | 5.74  |
| 2000.00 | 8.47              | 17.21 | 6.00               | 14.07 | 3.17            | 6.57  | 2.49             | 5.81  |

### S5.4. (E)-3mhex

| T (K)  | (E)-3mhex |       | Alpha-site (abs) |       | Beta-site (abs) |       | Gamma-site (abs) |       | Delta-site (abs) |       |
|--------|-----------|-------|------------------|-------|-----------------|-------|------------------|-------|------------------|-------|
|        | MS-T      | MS-QH | MS-T             | MS-QH | MS-T            | MS-QH | MS-T             | MS-QH | MS-T             | MS-QH |
| 250.00 | 5.68      | 7.20  | 5.22             | 6.52  | 1.36            | 3.46  | 7.94             | 9.08  | 2.85             | 3.53  |
| 300.00 | 6.32      | 7.63  | 5.86             | 6.95  | 1.49            | 3.59  | 8.89             | 9.62  | 3.27             | 3.87  |

|         |      |       |       |       |      |      |       |       |      |      |
|---------|------|-------|-------|-------|------|------|-------|-------|------|------|
| 400.00  | 7.36 | 8.30  | 7.24  | 7.87  | 1.69 | 3.80 | 10.48 | 10.51 | 3.98 | 4.43 |
| 500.00  | 8.06 | 8.79  | 8.64  | 8.78  | 1.80 | 3.96 | 11.60 | 11.20 | 4.50 | 4.85 |
| 600.00  | 8.48 | 9.17  | 9.92  | 9.64  | 1.84 | 4.08 | 12.27 | 11.74 | 4.85 | 5.19 |
| 700.00  | 8.66 | 9.47  | 11.02 | 10.43 | 1.83 | 4.18 | 12.56 | 12.17 | 5.07 | 5.47 |
| 800.00  | 8.67 | 9.73  | 11.91 | 11.17 | 1.79 | 4.26 | 12.58 | 12.54 | 5.18 | 5.71 |
| 900.00  | 8.57 | 9.96  | 12.59 | 11.84 | 1.73 | 4.33 | 12.41 | 12.85 | 5.21 | 5.92 |
| 1000.00 | 8.38 | 10.17 | 13.08 | 12.45 | 1.66 | 4.39 | 12.11 | 13.12 | 5.18 | 6.10 |
| 1100.00 | 8.14 | 10.36 | 13.40 | 13.02 | 1.58 | 4.45 | 11.73 | 13.38 | 5.10 | 6.26 |
| 1200.00 | 7.87 | 10.55 | 13.58 | 13.54 | 1.51 | 4.50 | 11.31 | 13.61 | 5.00 | 6.41 |
| 1300.00 | 7.58 | 10.72 | 13.63 | 14.02 | 1.43 | 4.55 | 10.86 | 13.83 | 4.88 | 6.55 |
| 1400.00 | 7.28 | 10.90 | 13.60 | 14.47 | 1.35 | 4.59 | 10.40 | 14.05 | 4.75 | 6.68 |
| 1500.00 | 6.99 | 11.06 | 13.48 | 14.89 | 1.28 | 4.63 | 9.95  | 14.25 | 4.61 | 6.81 |
| 1600.00 | 6.70 | 11.23 | 13.31 | 15.28 | 1.21 | 4.67 | 9.51  | 14.46 | 4.46 | 6.93 |
| 1700.00 | 6.41 | 11.40 | 13.08 | 15.64 | 1.15 | 4.71 | 9.08  | 14.65 | 4.32 | 7.04 |
| 1800.00 | 6.13 | 11.56 | 12.83 | 15.99 | 1.08 | 4.75 | 8.67  | 14.84 | 4.17 | 7.15 |
| 1900.00 | 5.86 | 11.72 | 12.54 | 16.32 | 1.03 | 4.78 | 8.28  | 15.03 | 4.03 | 7.26 |
| 2000.00 | 5.61 | 11.87 | 12.23 | 16.62 | 0.97 | 4.82 | 7.90  | 15.22 | 3.89 | 7.36 |

| T (K)   | Methyl-site (abs) |       | Epsilon-site (abs) |       | Beta-site (add) |       | Gamma-site (add) |       |
|---------|-------------------|-------|--------------------|-------|-----------------|-------|------------------|-------|
|         | MS-T              | MS-QH | MS-T               | MS-QH | MS-T            | MS-QH | MS-T             | MS-QH |
| 250.00  | 8.02              | 12.36 | 10.31              | 13.26 | 8.84            | 11.28 | 7.63             | 8.70  |
| 300.00  | 9.09              | 13.26 | 11.90              | 14.71 | 10.09           | 12.28 | 8.73             | 9.48  |
| 400.00  | 10.99             | 14.69 | 14.55              | 17.12 | 12.30           | 14.11 | 10.53            | 10.78 |
| 500.00  | 12.53             | 15.78 | 16.45              | 19.02 | 14.01           | 15.72 | 11.75            | 11.81 |
| 600.00  | 13.70             | 16.66 | 17.68              | 20.56 | 15.20           | 17.13 | 12.47            | 12.64 |
| 700.00  | 14.54             | 17.38 | 18.36              | 21.85 | 15.94           | 18.37 | 12.78            | 13.33 |
| 800.00  | 15.10             | 18.00 | 18.62              | 22.95 | 16.31           | 19.45 | 12.81            | 13.91 |
| 900.00  | 15.42             | 18.55 | 18.58              | 23.91 | 16.40           | 20.42 | 12.63            | 14.41 |
| 1000.00 | 15.55             | 19.04 | 18.32              | 24.76 | 16.29           | 21.29 | 12.33            | 14.86 |
| 1100.00 | 15.53             | 19.48 | 17.92              | 25.54 | 16.02           | 22.07 | 11.94            | 15.26 |
| 1200.00 | 15.39             | 19.90 | 17.43              | 26.25 | 15.66           | 22.79 | 11.51            | 15.62 |
| 1300.00 | 15.17             | 20.28 | 16.87              | 26.91 | 15.23           | 23.46 | 11.05            | 15.96 |
| 1400.00 | 14.88             | 20.65 | 16.28              | 27.54 | 14.76           | 24.08 | 10.58            | 16.27 |
| 1500.00 | 14.54             | 20.99 | 15.68              | 28.13 | 14.26           | 24.66 | 10.11            | 16.56 |
| 1600.00 | 14.16             | 21.32 | 15.07              | 28.70 | 13.75           | 25.21 | 9.65             | 16.84 |
| 1700.00 | 13.76             | 21.63 | 14.46              | 29.24 | 13.24           | 25.72 | 9.21             | 17.11 |
| 1800.00 | 13.34             | 21.93 | 13.87              | 29.75 | 12.73           | 26.21 | 8.78             | 17.36 |
| 1900.00 | 12.91             | 22.22 | 13.29              | 30.25 | 12.23           | 26.68 | 8.37             | 17.60 |
| 2000.00 | 12.48             | 22.50 | 12.73              | 30.73 | 11.73           | 27.12 | 7.98             | 17.83 |

## S5.5. (Z)-4mhex

| T (K)   | (Z)-4mhex |       | Alpha-site (abs) |       | Beta-site (abs) |       | Gamma-site (abs) |       | Delta-site (abs) |       |
|---------|-----------|-------|------------------|-------|-----------------|-------|------------------|-------|------------------|-------|
|         | MS-T      | MS-QH | MS-T             | MS-QH | MS-T            | MS-QH | MS-T             | MS-QH | MS-T             | MS-QH |
| 250.00  | 15.62     | 14.68 | 3.79             | 3.66  | 2.67            | 2.57  | 6.71             | 6.19  | 11.36            | 10.62 |
| 300.00  | 18.43     | 16.86 | 4.87             | 4.46  | 3.06            | 2.82  | 8.26             | 7.38  | 14.86            | 13.48 |
| 400.00  | 22.82     | 20.92 | 6.91             | 5.99  | 3.62            | 3.22  | 11.04            | 9.83  | 21.34            | 19.17 |
| 500.00  | 25.50     | 24.44 | 8.63             | 7.36  | 3.95            | 3.53  | 13.11            | 12.16 | 26.41            | 24.48 |
| 600.00  | 26.80     | 27.44 | 9.95             | 8.57  | 4.11            | 3.78  | 14.46            | 14.29 | 29.93            | 29.27 |
| 700.00  | 27.14     | 30.00 | 10.90            | 9.64  | 4.17            | 3.98  | 15.20            | 16.18 | 32.11            | 33.52 |
| 800.00  | 26.86     | 32.20 | 11.54            | 10.59 | 4.14            | 4.15  | 15.51            | 17.87 | 33.26            | 37.30 |
| 900.00  | 26.21     | 34.12 | 11.93            | 11.44 | 4.07            | 4.31  | 15.51            | 19.38 | 33.66            | 40.67 |
| 1000.00 | 25.34     | 35.82 | 12.12            | 12.20 | 3.97            | 4.44  | 15.31            | 20.74 | 33.54            | 43.70 |
| 1100.00 | 24.35     | 37.35 | 12.17            | 12.89 | 3.86            | 4.57  | 14.97            | 21.97 | 33.07            | 46.45 |
| 1200.00 | 23.33     | 38.73 | 12.10            | 13.52 | 3.73            | 4.69  | 14.55            | 23.11 | 32.36            | 48.97 |
| 1300.00 | 22.29     | 39.99 | 11.96            | 14.10 | 3.60            | 4.80  | 14.08            | 24.16 | 31.50            | 51.28 |
| 1400.00 | 21.28     | 41.17 | 11.76            | 14.63 | 3.48            | 4.91  | 13.59            | 25.14 | 30.55            | 53.43 |
| 1500.00 | 20.30     | 42.26 | 11.51            | 15.12 | 3.35            | 5.01  | 13.09            | 26.06 | 29.55            | 55.43 |
| 1600.00 | 19.35     | 43.28 | 11.24            | 15.57 | 3.23            | 5.11  | 12.59            | 26.92 | 28.52            | 57.31 |
| 1700.00 | 18.45     | 44.24 | 10.95            | 16.00 | 3.11            | 5.21  | 12.09            | 27.74 | 27.49            | 59.08 |
| 1800.00 | 17.59     | 45.15 | 10.64            | 16.39 | 2.99            | 5.30  | 11.61            | 28.51 | 26.47            | 60.75 |
| 1900.00 | 16.78     | 46.01 | 10.33            | 16.77 | 2.88            | 5.39  | 11.14            | 29.25 | 25.46            | 62.33 |
| 2000.00 | 16.00     | 46.83 | 10.01            | 17.11 | 2.77            | 5.48  | 10.69            | 29.95 | 24.48            | 63.83 |

| T (K)  | Methyl-site (abs) |       | Epsilon-site (abs) |       | Gamma-site (add) |       | Delta-site (add) |        |
|--------|-------------------|-------|--------------------|-------|------------------|-------|------------------|--------|
|        | MS-T              | MS-QH | MS-T               | MS-QH | MS-T             | MS-QH | MS-T             | MS-QH  |
| 250.00 | 35.21             | 41.55 | 11.51              | 14.49 | 14.24            | 17.72 | 26.57            | 28.43  |
| 300.00 | 42.38             | 48.00 | 15.35              | 18.78 | 17.31            | 21.35 | 36.09            | 37.36  |
| 400.00 | 55.47             | 60.06 | 23.32              | 27.61 | 22.45            | 28.55 | 54.26            | 55.97  |
| 500.00 | 65.91             | 70.60 | 30.67              | 36.05 | 26.06            | 35.27 | 68.77            | 74.10  |
| 600.00 | 73.47             | 79.63 | 36.77              | 43.73 | 28.31            | 41.33 | 78.86            | 90.85  |
| 700.00 | 78.46             | 87.35 | 41.50              | 50.58 | 29.50            | 46.72 | 85.10            | 106.02 |

|         |       |        |       |       |       |       |       |        |
|---------|-------|--------|-------|-------|-------|-------|-------|--------|
| 800.00  | 81.38 | 94.00  | 44.96 | 56.67 | 29.94 | 51.52 | 88.37 | 119.66 |
| 900.00  | 82.71 | 99.80  | 47.36 | 62.10 | 29.87 | 55.79 | 89.51 | 131.94 |
| 1000.00 | 82.86 | 104.89 | 48.90 | 66.98 | 29.45 | 59.63 | 89.18 | 143.04 |
| 1100.00 | 82.15 | 109.42 | 49.77 | 71.39 | 28.80 | 63.10 | 87.87 | 153.14 |
| 1200.00 | 80.82 | 113.49 | 50.12 | 75.42 | 28.01 | 66.26 | 85.91 | 162.38 |
| 1300.00 | 79.06 | 117.16 | 50.07 | 79.11 | 27.13 | 69.16 | 83.54 | 170.88 |
| 1400.00 | 77.00 | 120.51 | 49.72 | 82.53 | 26.21 | 71.83 | 80.93 | 178.74 |
| 1500.00 | 74.74 | 123.59 | 49.14 | 85.71 | 25.26 | 74.31 | 78.19 | 186.05 |
| 1600.00 | 72.37 | 126.42 | 48.39 | 88.67 | 24.31 | 76.61 | 75.39 | 192.88 |
| 1700.00 | 69.94 | 129.05 | 47.52 | 91.46 | 23.37 | 78.77 | 72.60 | 199.28 |
| 1800.00 | 67.49 | 131.49 | 46.54 | 94.08 | 22.45 | 80.78 | 69.84 | 205.30 |
| 1900.00 | 65.05 | 133.78 | 45.50 | 96.55 | 21.56 | 82.68 | 67.13 | 210.97 |
| 2000.00 | 62.65 | 135.91 | 44.41 | 98.90 | 20.69 | 84.47 | 64.51 | 216.33 |

## S5.6. (E)-4mhex

| T (K)   | (E)-4mhex |       | Alpha-site (abs) |       | Beta-site (abs) |       | Gamma-site (abs) |       | Delta-site (abs) |       |
|---------|-----------|-------|------------------|-------|-----------------|-------|------------------|-------|------------------|-------|
|         | MS-T      | MS-QH | MS-T             | MS-QH | MS-T            | MS-QH | MS-T             | MS-QH | MS-T             | MS-QH |
| 250.00  | 8.37      | 9.67  | 3.18             | 3.78  | 3.15            | 3.50  | 3.99             | 4.05  | 5.61             | 5.99  |
| 300.00  | 9.83      | 10.91 | 4.04             | 4.52  | 3.71            | 3.90  | 4.71             | 4.62  | 6.97             | 7.22  |
| 400.00  | 12.43     | 13.17 | 5.76             | 5.86  | 4.64            | 4.52  | 5.98             | 5.71  | 9.49             | 9.61  |
| 500.00  | 14.40     | 15.06 | 7.36             | 7.01  | 5.32            | 4.98  | 6.89             | 6.66  | 11.45            | 11.76 |
| 600.00  | 15.73     | 16.63 | 8.72             | 8.00  | 5.78            | 5.34  | 7.45             | 7.47  | 12.78            | 13.63 |
| 700.00  | 16.52     | 17.94 | 9.82             | 8.85  | 6.06            | 5.62  | 7.75             | 8.16  | 13.60            | 15.25 |
| 800.00  | 16.91     | 19.05 | 10.66            | 9.60  | 6.22            | 5.86  | 7.84             | 8.75  | 14.01            | 16.66 |
| 900.00  | 17.00     | 20.01 | 11.27            | 10.25 | 6.28            | 6.05  | 7.80             | 9.26  | 14.14            | 17.89 |
| 1000.00 | 16.87     | 20.86 | 11.69            | 10.84 | 6.27            | 6.23  | 7.66             | 9.72  | 14.07            | 18.99 |
| 1100.00 | 16.60     | 21.63 | 11.95            | 11.37 | 6.21            | 6.38  | 7.46             | 10.12 | 13.87            | 19.98 |
| 1200.00 | 16.23     | 22.32 | 12.08            | 11.85 | 6.12            | 6.53  | 7.23             | 10.49 | 13.58            | 20.89 |
| 1300.00 | 15.80     | 22.97 | 12.11            | 12.28 | 6.00            | 6.66  | 6.98             | 10.83 | 13.23            | 21.71 |
| 1400.00 | 15.32     | 23.57 | 12.06            | 12.69 | 5.87            | 6.78  | 6.72             | 11.15 | 12.85            | 22.48 |
| 1500.00 | 14.82     | 24.13 | 11.95            | 13.06 | 5.73            | 6.90  | 6.45             | 11.44 | 12.45            | 23.20 |
| 1600.00 | 14.31     | 24.67 | 11.79            | 13.41 | 5.58            | 7.01  | 6.19             | 11.71 | 12.04            | 23.87 |
| 1700.00 | 13.79     | 25.18 | 11.59            | 13.74 | 5.42            | 7.12  | 5.93             | 11.97 | 11.63            | 24.50 |
| 1800.00 | 13.28     | 25.66 | 11.36            | 14.04 | 5.27            | 7.22  | 5.68             | 12.21 | 11.22            | 25.10 |
| 1900.00 | 12.77     | 26.12 | 11.11            | 14.33 | 5.11            | 7.32  | 5.43             | 12.45 | 10.82            | 25.67 |
| 2000.00 | 12.28     | 26.57 | 10.84            | 14.60 | 4.96            | 7.42  | 5.20             | 12.67 | 10.43            | 26.21 |

| T (K)   | Methyl-site (abs) |       | Epsilon-site (abs) |       | Gamma-site (add) |       | Delta-site (add) |        |
|---------|-------------------|-------|--------------------|-------|------------------|-------|------------------|--------|
|         | MS-T              | MS-QH | MS-T               | MS-QH | MS-T             | MS-QH | MS-T             | MS-QH  |
| 250.00  | 12.77             | 18.36 | 13.95              | 18.12 | 14.24            | 17.72 | 26.57            | 28.43  |
| 300.00  | 15.18             | 20.72 | 16.07              | 20.16 | 17.31            | 21.35 | 36.09            | 37.36  |
| 400.00  | 19.94             | 25.04 | 19.88              | 23.87 | 22.45            | 28.55 | 54.26            | 55.97  |
| 500.00  | 24.17             | 28.68 | 23.04              | 27.03 | 26.06            | 35.27 | 68.77            | 74.10  |
| 600.00  | 27.62             | 31.71 | 25.53              | 29.69 | 28.31            | 41.33 | 78.86            | 90.85  |
| 700.00  | 30.24             | 34.24 | 27.39              | 31.95 | 29.50            | 46.72 | 85.10            | 106.02 |
| 800.00  | 32.10             | 36.39 | 28.73              | 33.89 | 29.94            | 51.52 | 88.37            | 119.66 |
| 900.00  | 33.32             | 38.24 | 29.62              | 35.60 | 29.87            | 55.79 | 89.51            | 131.94 |
| 1000.00 | 34.01             | 39.85 | 30.16              | 37.11 | 29.45            | 59.63 | 89.18            | 143.04 |
| 1100.00 | 34.29             | 41.29 | 30.43              | 38.48 | 28.80            | 63.10 | 87.87            | 153.14 |
| 1200.00 | 34.23             | 42.58 | 30.47              | 39.74 | 28.01            | 66.26 | 85.91            | 162.38 |
| 1300.00 | 33.92             | 43.75 | 30.34              | 40.91 | 27.13            | 69.16 | 83.54            | 170.88 |
| 1400.00 | 33.41             | 44.82 | 30.08              | 42.00 | 26.21            | 71.83 | 80.93            | 178.74 |
| 1500.00 | 32.76             | 45.81 | 29.71              | 43.03 | 25.26            | 74.31 | 78.19            | 186.05 |
| 1600.00 | 32.00             | 46.73 | 29.26              | 44.01 | 24.31            | 76.61 | 75.39            | 192.88 |
| 1700.00 | 31.17             | 47.59 | 28.74              | 44.94 | 23.37            | 78.77 | 72.60            | 199.28 |
| 1800.00 | 30.28             | 48.39 | 28.18              | 45.83 | 22.45            | 80.78 | 69.84            | 205.30 |
| 1900.00 | 29.37             | 49.15 | 27.57              | 46.68 | 21.56            | 82.68 | 67.13            | 210.97 |
| 2000.00 | 28.43             | 49.86 | 26.94              | 47.49 | 20.69            | 84.47 | 64.51            | 216.33 |

## S5.7. 5mhex

| T (K)  | 5mhex |       | Alpha-site (abs) |       | Beta-site (abs) |       | Gamma-site (abs) |       | Delta-site (abs) |       |
|--------|-------|-------|------------------|-------|-----------------|-------|------------------|-------|------------------|-------|
|        | MS-T  | MS-QH | MS-T             | MS-QH | MS-T            | MS-QH | MS-T             | MS-QH | MS-T             | MS-QH |
| 250.00 | 13.67 | 15.62 | 7.47             | 8.83  | 7.99            | 8.56  | 7.29             | 8.12  | 8.11             | 8.75  |
| 300.00 | 17.29 | 19.22 | 9.32             | 10.49 | 10.30           | 10.54 | 9.03             | 9.82  | 10.74            | 11.24 |
| 400.00 | 24.40 | 26.34 | 13.11            | 13.62 | 14.96           | 14.46 | 12.47            | 13.23 | 15.97            | 16.29 |
| 500.00 | 30.62 | 32.90 | 16.70            | 16.42 | 19.16           | 18.08 | 15.57            | 16.43 | 20.57            | 21.05 |
| 600.00 | 35.62 | 38.69 | 19.89            | 18.87 | 22.62           | 21.31 | 18.20            | 19.31 | 24.26            | 25.34 |
| 700.00 | 39.42 | 43.77 | 22.58            | 21.02 | 25.30           | 24.17 | 20.34            | 21.87 | 27.05            | 29.15 |

|         |       |       |       |       |       |       |       |       |       |       |
|---------|-------|-------|-------|-------|-------|-------|-------|-------|-------|-------|
| 800.00  | 42.15 | 48.22 | 24.78 | 22.92 | 27.25 | 26.70 | 22.00 | 24.15 | 29.06 | 32.52 |
| 900.00  | 44.00 | 52.16 | 26.51 | 24.60 | 28.60 | 28.96 | 23.26 | 26.18 | 30.42 | 35.52 |
| 1000.00 | 45.15 | 55.67 | 27.83 | 26.10 | 29.44 | 30.99 | 24.18 | 28.01 | 31.26 | 38.21 |
| 1100.00 | 45.73 | 58.83 | 28.78 | 27.46 | 29.88 | 32.83 | 24.80 | 29.66 | 31.70 | 40.64 |
| 1200.00 | 45.87 | 61.70 | 29.43 | 28.69 | 30.01 | 34.50 | 25.19 | 31.17 | 31.82 | 42.84 |
| 1300.00 | 45.68 | 64.33 | 29.81 | 29.81 | 29.91 | 36.04 | 25.39 | 32.55 | 31.70 | 44.87 |
| 1400.00 | 45.21 | 66.76 | 29.97 | 30.84 | 29.61 | 37.46 | 25.42 | 33.83 | 31.39 | 46.73 |
| 1500.00 | 44.55 | 69.01 | 29.96 | 31.79 | 29.18 | 38.78 | 25.33 | 35.01 | 30.94 | 48.47 |
| 1600.00 | 43.74 | 71.12 | 29.79 | 32.67 | 28.64 | 40.01 | 25.14 | 36.12 | 30.38 | 50.08 |
| 1700.00 | 42.81 | 73.09 | 29.51 | 33.49 | 28.02 | 41.16 | 24.87 | 37.15 | 29.74 | 51.59 |
| 1800.00 | 41.80 | 74.94 | 29.13 | 34.26 | 27.35 | 42.25 | 24.52 | 38.13 | 29.05 | 53.01 |
| 1900.00 | 40.73 | 76.70 | 28.67 | 34.98 | 26.64 | 43.28 | 24.13 | 39.04 | 28.31 | 54.35 |
| 2000.00 | 39.63 | 78.35 | 28.15 | 35.65 | 25.91 | 44.25 | 23.69 | 39.91 | 27.55 | 55.61 |

| T (K)   | Methyl-site (abs) |        | Epsilon1-site (abs) |       | Epsilon2-site (abs) |        | Delta-site (add) |        | Epsilon-site (add) |       |
|---------|-------------------|--------|---------------------|-------|---------------------|--------|------------------|--------|--------------------|-------|
|         | MS-T              | MS-QH  | MS-T                | MS-QH | MS-T                | MS-QH  | MS-T             | MS-QH  | MS-T               | MS-QH |
| 250.00  | 30.95             | 44.38  | 11.23               | 12.83 | 19.40               | 21.59  | 55.92            | 58.74  | 7.63               | 8.83  |
| 300.00  | 39.73             | 54.46  | 14.25               | 15.85 | 25.17               | 27.23  | 68.04            | 69.33  | 10.23              | 11.40 |
| 400.00  | 58.39             | 74.12  | 20.13               | 21.85 | 36.67               | 38.77  | 91.02            | 90.19  | 15.48              | 16.56 |
| 500.00  | 76.81             | 92.01  | 25.24               | 27.42 | 46.89               | 49.79  | 110.35           | 109.34 | 20.24              | 21.40 |
| 600.00  | 93.63             | 107.78 | 29.33               | 32.39 | 55.20               | 59.82  | 125.43           | 126.37 | 24.20              | 25.77 |
| 700.00  | 108.21            | 121.55 | 32.42               | 36.78 | 61.57               | 68.78  | 136.58           | 141.40 | 27.33              | 29.65 |
| 800.00  | 120.36            | 133.60 | 34.63               | 40.65 | 66.22               | 76.75  | 144.45           | 154.71 | 29.69              | 33.09 |
| 900.00  | 130.13            | 144.21 | 36.13               | 44.09 | 69.44               | 83.85  | 149.65           | 166.60 | 31.40              | 36.15 |
| 1000.00 | 137.71            | 153.61 | 37.05               | 47.16 | 71.50               | 90.22  | 152.77           | 177.30 | 32.58              | 38.90 |
| 1100.00 | 143.34            | 162.01 | 37.52               | 49.93 | 72.65               | 95.98  | 154.26           | 187.02 | 33.32              | 41.39 |
| 1200.00 | 147.28            | 169.56 | 37.62               | 52.45 | 73.07               | 101.21 | 154.47           | 195.94 | 33.72              | 43.66 |
| 1300.00 | 149.77            | 176.40 | 37.45               | 54.75 | 72.92               | 106.00 | 153.69           | 204.17 | 33.85              | 45.73 |
| 1400.00 | 151.04            | 182.64 | 37.07               | 56.88 | 72.34               | 110.41 | 152.15           | 211.82 | 33.75              | 47.65 |
| 1500.00 | 151.30            | 188.35 | 36.52               | 58.85 | 71.42               | 114.49 | 150.02           | 218.97 | 33.49              | 49.43 |
| 1600.00 | 150.73            | 193.61 | 35.85               | 60.68 | 70.24               | 118.28 | 147.44           | 225.68 | 33.09              | 51.09 |
| 1700.00 | 149.47            | 198.47 | 35.08               | 62.40 | 68.86               | 121.83 | 144.52           | 232.01 | 32.58              | 52.64 |
| 1800.00 | 147.67            | 202.98 | 34.25               | 64.01 | 67.34               | 125.15 | 141.35           | 237.99 | 31.99              | 54.10 |
| 1900.00 | 145.43            | 207.19 | 33.37               | 65.52 | 65.72               | 128.28 | 138.00           | 243.66 | 31.34              | 55.48 |
| 2000.00 | 142.84            | 211.11 | 32.47               | 66.95 | 64.03               | 131.23 | 134.53           | 249.04 | 30.65              | 56.78 |

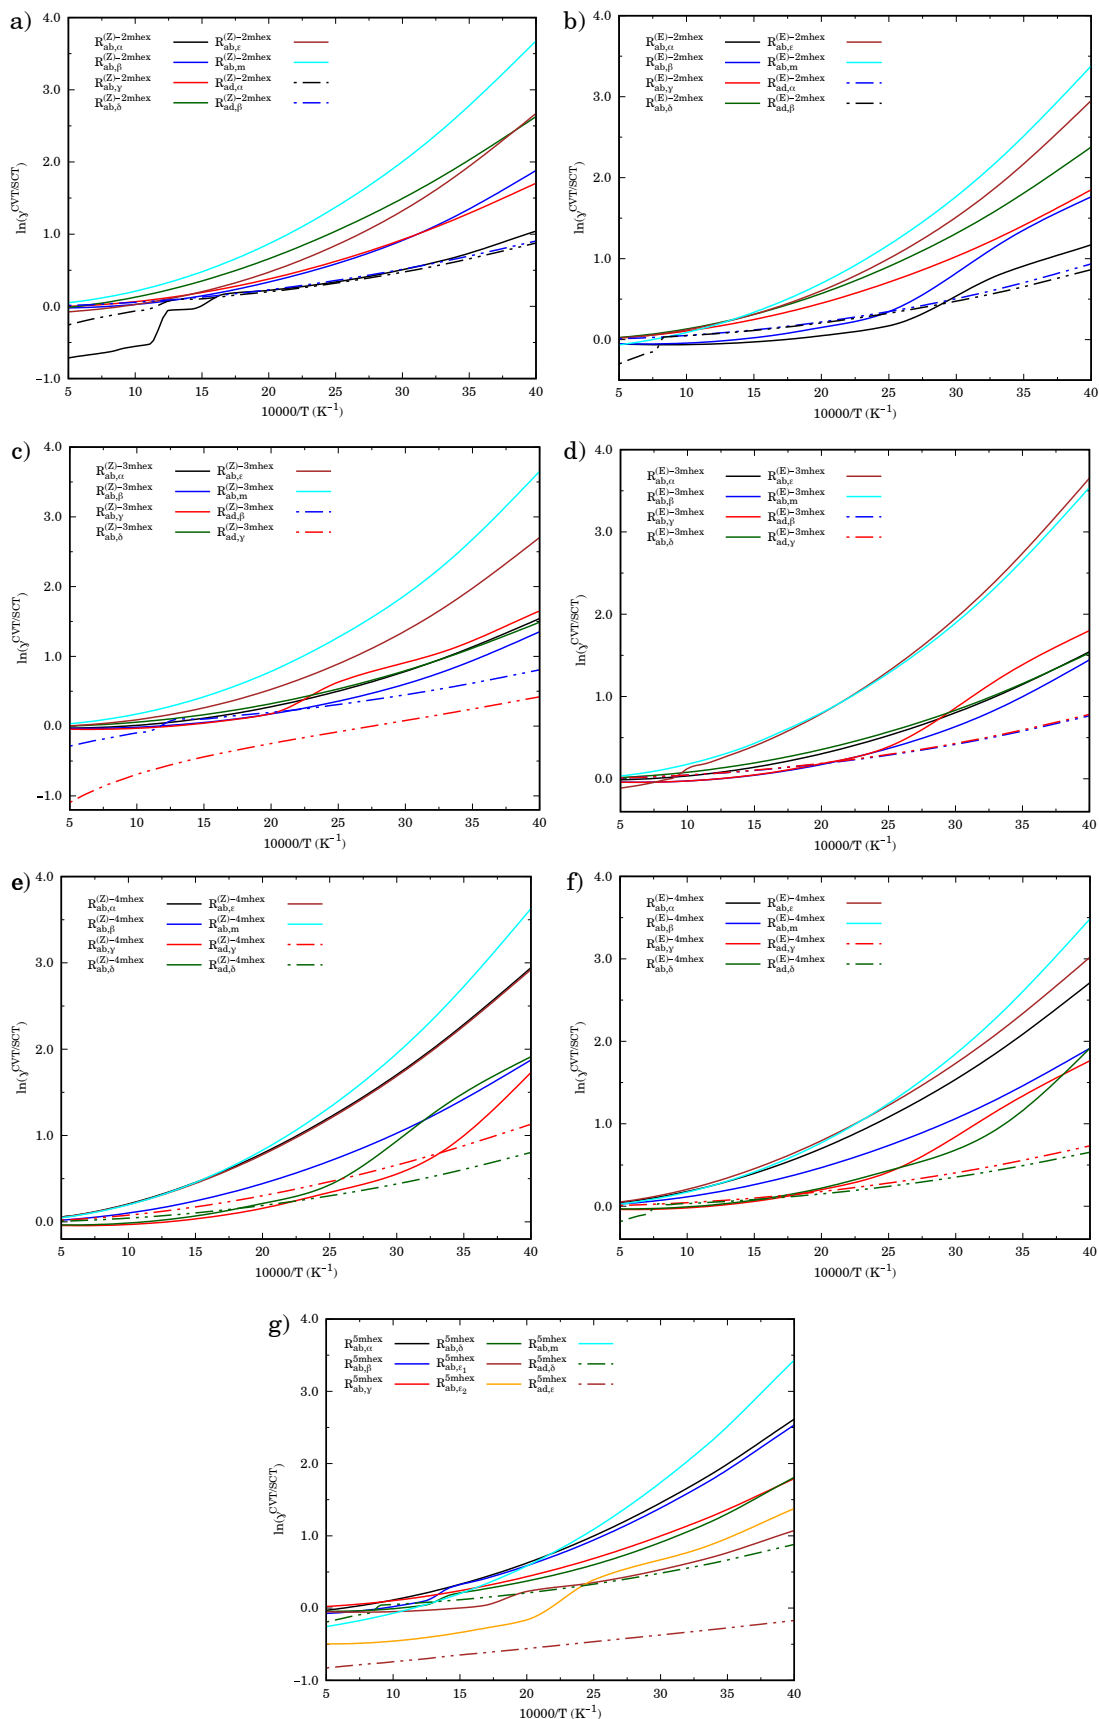

Fig. S2.: Transmission coefficient  $\gamma^{\text{CVT/SCT}}$  for the most stable transition state at each site of H-abstraction and addition in: (a) methyl (Z)-hex-2-enoate, (b) methyl (E)-hex-2-enoate, (c) methyl (Z)-hex-3-enoate, (d) methyl (E)-hex-3-enoate, (e) methyl (Z)-hex-4-enoate, (f) methyl (E)-hex-4-enoate, and (g) methyl hex-5-enoate.

## S6. Calculation of Overall Rate Constants

The overall rate constants listed below are given in  $\text{cm}^3 \text{ molecule}^{-1} \text{ s}^{-1}$ .

|         | Overall  | (Z)-2mhex<br>Abs-total | Add-total |
|---------|----------|------------------------|-----------|
| 250.00  | 2.77E-13 | 8.20E-15               | 2.69E-13  |
| 300.00  | 5.28E-13 | 2.23E-14               | 5.06E-13  |
| 400.00  | 1.45E-12 | 1.04E-13               | 1.35E-12  |
| 500.00  | 3.11E-12 | 3.26E-13               | 2.78E-12  |
| 600.00  | 5.69E-12 | 8.01E-13               | 4.89E-12  |
| 700.00  | 9.38E-12 | 1.67E-12               | 7.71E-12  |
| 800.00  | 1.44E-11 | 3.10E-12               | 1.13E-11  |
| 900.00  | 2.03E-11 | 5.26E-12               | 1.50E-11  |
| 1000.00 | 2.80E-11 | 8.36E-12               | 1.97E-11  |
| 1100.00 | 3.75E-11 | 1.26E-11               | 2.50E-11  |
| 1200.00 | 4.89E-11 | 1.81E-11               | 3.08E-11  |
| 1300.00 | 6.23E-11 | 2.51E-11               | 3.72E-11  |
| 1400.00 | 7.79E-11 | 3.38E-11               | 4.41E-11  |
| 1500.00 | 9.58E-11 | 4.43E-11               | 5.15E-11  |
| 1600.00 | 1.16E-10 | 5.67E-11               | 5.94E-11  |
| 1700.00 | 1.39E-10 | 7.12E-11               | 6.76E-11  |
| 1800.00 | 1.64E-10 | 8.78E-11               | 7.63E-11  |
| 1900.00 | 1.92E-10 | 1.07E-10               | 8.54E-11  |
| 2000.00 | 2.23E-10 | 1.28E-10               | 9.49E-11  |

|         | Overall  | (E)-2mhex<br>Abs-total | Add-total |
|---------|----------|------------------------|-----------|
| 250.00  | 1.90E-13 | 5.35E-15               | 1.84E-13  |
| 300.00  | 4.22E-13 | 1.61E-14               | 4.06E-13  |
| 400.00  | 1.35E-12 | 8.29E-14               | 1.27E-12  |
| 500.00  | 3.06E-12 | 2.72E-13               | 2.78E-12  |
| 600.00  | 5.70E-12 | 6.91E-13               | 5.00E-12  |
| 700.00  | 9.42E-12 | 1.48E-12               | 7.94E-12  |
| 800.00  | 1.44E-11 | 2.83E-12               | 1.16E-11  |
| 900.00  | 2.08E-11 | 4.94E-12               | 1.59E-11  |
| 1000.00 | 2.89E-11 | 8.02E-12               | 2.08E-11  |
| 1100.00 | 3.88E-11 | 1.23E-11               | 2.64E-11  |
| 1200.00 | 5.07E-11 | 1.81E-11               | 3.26E-11  |
| 1300.00 | 6.16E-11 | 2.55E-11               | 3.61E-11  |
| 1400.00 | 7.72E-11 | 3.48E-11               | 4.24E-11  |
| 1500.00 | 9.51E-11 | 4.61E-11               | 4.90E-11  |
| 1600.00 | 1.16E-10 | 5.97E-11               | 5.59E-11  |
| 1700.00 | 1.39E-10 | 7.58E-11               | 6.33E-11  |
| 1800.00 | 1.65E-10 | 9.44E-11               | 7.09E-11  |
| 1900.00 | 1.95E-10 | 1.16E-10               | 7.90E-11  |
| 2000.00 | 2.27E-10 | 1.40E-10               | 8.72E-11  |

|         | Overall  | (Z)-3mhex<br>Abs-total | Add-total |
|---------|----------|------------------------|-----------|
| 250.00  | 3.90E-13 | 1.70E-14               | 3.73E-13  |
| 300.00  | 7.17E-13 | 4.49E-14               | 6.72E-13  |
| 400.00  | 1.80E-12 | 1.97E-13               | 1.60E-12  |
| 500.00  | 3.56E-12 | 5.79E-13               | 2.98E-12  |
| 600.00  | 6.13E-12 | 1.33E-12               | 4.80E-12  |
| 700.00  | 9.68E-12 | 2.62E-12               | 7.06E-12  |
| 800.00  | 1.43E-11 | 4.63E-12               | 9.72E-12  |
| 900.00  | 1.95E-11 | 7.59E-12               | 1.19E-11  |
| 1000.00 | 2.67E-11 | 1.17E-11               | 1.50E-11  |
| 1100.00 | 3.54E-11 | 1.73E-11               | 1.82E-11  |
| 1200.00 | 4.61E-11 | 2.45E-11               | 2.17E-11  |
| 1300.00 | 5.90E-11 | 3.36E-11               | 2.54E-11  |
| 1400.00 | 7.42E-11 | 4.48E-11               | 2.94E-11  |
| 1500.00 | 9.19E-11 | 5.84E-11               | 3.35E-11  |
| 1600.00 | 1.12E-10 | 7.45E-11               | 3.79E-11  |
| 1700.00 | 1.36E-10 | 9.33E-11               | 4.24E-11  |
| 1800.00 | 1.62E-10 | 1.15E-10               | 4.71E-11  |
| 1900.00 | 1.92E-10 | 1.40E-10               | 5.19E-11  |
| 2000.00 | 2.24E-10 | 1.67E-10               | 5.70E-11  |

|  | Overall | (E)-3mhex<br>Abs-total | Add-total |
|--|---------|------------------------|-----------|
|--|---------|------------------------|-----------|

|         |          |          |          |
|---------|----------|----------|----------|
| 250.00  | 3.91E-13 | 1.08E-14 | 3.81E-13 |
| 300.00  | 8.27E-13 | 3.14E-14 | 7.96E-13 |
| 400.00  | 2.45E-12 | 1.52E-13 | 2.30E-12 |
| 500.00  | 5.28E-12 | 4.68E-13 | 4.81E-12 |
| 600.00  | 9.44E-12 | 1.11E-12 | 8.33E-12 |
| 700.00  | 1.51E-11 | 2.22E-12 | 1.28E-11 |
| 800.00  | 2.23E-11 | 3.99E-12 | 1.83E-11 |
| 900.00  | 3.12E-11 | 6.59E-12 | 2.46E-11 |
| 1000.00 | 4.20E-11 | 1.02E-11 | 3.18E-11 |
| 1100.00 | 5.48E-11 | 1.51E-11 | 3.97E-11 |
| 1200.00 | 6.97E-11 | 2.14E-11 | 4.83E-11 |
| 1300.00 | 8.70E-11 | 2.93E-11 | 5.77E-11 |
| 1400.00 | 1.07E-10 | 3.92E-11 | 6.76E-11 |
| 1500.00 | 1.29E-10 | 5.10E-11 | 7.82E-11 |
| 1600.00 | 1.54E-10 | 6.51E-11 | 8.93E-11 |
| 1700.00 | 1.82E-10 | 8.15E-11 | 1.01E-10 |
| 1800.00 | 2.14E-10 | 1.00E-10 | 1.13E-10 |
| 1900.00 | 2.48E-10 | 1.22E-10 | 1.26E-10 |
| 2000.00 | 2.85E-10 | 1.46E-10 | 1.39E-10 |

(Z)-4mhex

|         | Overall  | Abs-total | Add-total |
|---------|----------|-----------|-----------|
| 250.00  | 4.59E-13 | 3.52E-15  | 4.56E-13  |
| 300.00  | 8.74E-13 | 1.19E-14  | 8.62E-13  |
| 400.00  | 2.31E-12 | 7.25E-14  | 2.23E-12  |
| 500.00  | 4.70E-12 | 2.63E-13  | 4.43E-12  |
| 600.00  | 8.20E-12 | 7.05E-13  | 7.49E-12  |
| 700.00  | 1.30E-11 | 1.56E-12  | 1.14E-11  |
| 800.00  | 1.92E-11 | 3.03E-12  | 1.61E-11  |
| 900.00  | 2.70E-11 | 5.32E-12  | 2.17E-11  |
| 1000.00 | 3.66E-11 | 8.67E-12  | 2.79E-11  |
| 1100.00 | 4.83E-11 | 1.33E-11  | 3.49E-11  |
| 1200.00 | 6.21E-11 | 1.96E-11  | 4.26E-11  |
| 1300.00 | 7.84E-11 | 2.76E-11  | 5.09E-11  |
| 1400.00 | 9.74E-11 | 3.76E-11  | 5.98E-11  |
| 1500.00 | 1.19E-10 | 4.98E-11  | 6.93E-11  |
| 1600.00 | 1.44E-10 | 6.43E-11  | 7.94E-11  |
| 1700.00 | 1.71E-10 | 8.15E-11  | 8.99E-11  |
| 1800.00 | 2.02E-10 | 1.01E-10  | 1.01E-10  |
| 1900.00 | 2.37E-10 | 1.24E-10  | 1.13E-10  |
| 2000.00 | 2.74E-10 | 1.49E-10  | 1.25E-10  |

(E)-4mhex

|         | Overall  | Abs-total | Add-total |
|---------|----------|-----------|-----------|
| 250.00  | 4.92E-13 | 3.47E-15  | 4.89E-13  |
| 300.00  | 9.93E-13 | 1.22E-14  | 9.81E-13  |
| 400.00  | 2.74E-12 | 7.58E-14  | 2.67E-12  |
| 500.00  | 5.60E-12 | 2.74E-13  | 5.32E-12  |
| 600.00  | 9.65E-12 | 7.26E-13  | 8.93E-12  |
| 700.00  | 1.50E-11 | 1.58E-12  | 1.34E-11  |
| 800.00  | 2.17E-11 | 3.03E-12  | 1.87E-11  |
| 900.00  | 3.00E-11 | 5.26E-12  | 2.48E-11  |
| 1000.00 | 4.00E-11 | 8.49E-12  | 3.15E-11  |
| 1100.00 | 5.18E-11 | 1.29E-11  | 3.89E-11  |
| 1200.00 | 6.57E-11 | 1.88E-11  | 4.69E-11  |
| 1300.00 | 8.18E-11 | 2.64E-11  | 5.54E-11  |
| 1400.00 | 9.72E-11 | 3.57E-11  | 6.15E-11  |
| 1500.00 | 1.17E-10 | 4.71E-11  | 7.01E-11  |
| 1600.00 | 1.40E-10 | 6.07E-11  | 7.91E-11  |
| 1700.00 | 1.65E-10 | 7.66E-11  | 8.84E-11  |
| 1800.00 | 1.93E-10 | 9.49E-11  | 9.80E-11  |
| 1900.00 | 2.24E-10 | 1.16E-10  | 1.08E-10  |
| 2000.00 | 2.58E-10 | 1.39E-10  | 1.18E-10  |

5mhex

|        | Overall  | Abs-total | Add-total |
|--------|----------|-----------|-----------|
| 250.00 | 1.18E-12 | 3.86E-15  | 1.17E-12  |
| 300.00 | 1.87E-12 | 1.24E-14  | 1.86E-12  |
| 400.00 | 3.75E-12 | 6.98E-14  | 3.68E-12  |
| 500.00 | 6.29E-12 | 2.44E-13  | 6.05E-12  |
| 600.00 | 9.64E-12 | 6.43E-13  | 8.99E-12  |
| 700.00 | 1.39E-11 | 1.41E-12  | 1.25E-11  |
| 800.00 | 1.91E-11 | 2.68E-12  | 1.64E-11  |

|         |          |          |          |
|---------|----------|----------|----------|
| 900.00  | 2.56E-11 | 4.68E-12 | 2.09E-11 |
| 1000.00 | 3.35E-11 | 7.61E-12 | 2.59E-11 |
| 1100.00 | 4.30E-11 | 1.17E-11 | 3.13E-11 |
| 1200.00 | 5.32E-11 | 1.71E-11 | 3.61E-11 |
| 1300.00 | 6.60E-11 | 2.40E-11 | 4.20E-11 |
| 1400.00 | 8.09E-11 | 3.26E-11 | 4.82E-11 |
| 1500.00 | 9.79E-11 | 4.32E-11 | 5.48E-11 |
| 1600.00 | 1.17E-10 | 5.58E-11 | 6.15E-11 |
| 1700.00 | 1.39E-10 | 7.06E-11 | 6.86E-11 |
| 1800.00 | 1.64E-10 | 8.77E-11 | 7.61E-11 |
| 1900.00 | 1.91E-10 | 1.07E-10 | 8.38E-11 |
| 2000.00 | 2.21E-10 | 1.29E-10 | 9.19E-11 |

## S7. Site-Specific MS-CVT/SCT Rate Constants

In this section, we present the individual rate constants for each site of H-abstraction and addition for all molecules studied. The values for addition reactions and abstractions at methylenic carbons do not include the weight 2, as discussed in Section S1. The site-specific rate constants listed below are given in  $\text{cm}^3 \text{ molecule}^{-1} \text{ s}^{-1}$ .

### S7.1. (*Z*)-2mhex

| T (K)   | Alpha-site | Beta-site | Gamma-site | Delta-site | Methyl-site | Epsilon-site |
|---------|------------|-----------|------------|------------|-------------|--------------|
| 250.00  | 1.14E-23   | 2.15E-20  | 3.99E-15   | 1.03E-16   | 3.23E-18    | 1.01E-18     |
| 300.00  | 1.13E-21   | 4.80E-19  | 1.06E-14   | 5.31E-16   | 2.47E-17    | 1.18E-17     |
| 400.00  | 4.60E-19   | 3.30E-17  | 4.63E-14   | 5.29E-15   | 4.71E-16    | 3.74E-16     |
| 500.00  | 1.98E-17   | 5.05E-16  | 1.35E-13   | 2.46E-14   | 3.57E-15    | 3.76E-15     |
| 600.00  | 2.65E-16   | 3.40E-15  | 3.06E-13   | 7.50E-14   | 1.57E-14    | 1.96E-14     |
| 700.00  | 1.49E-15   | 1.41E-14  | 5.92E-13   | 1.77E-13   | 4.93E-14    | 6.85E-14     |
| 800.00  | 6.47E-15   | 4.30E-14  | 1.02E-12   | 3.50E-13   | 1.23E-13    | 1.83E-13     |
| 900.00  | 1.33E-14   | 1.06E-13  | 1.62E-12   | 6.17E-13   | 2.61E-13    | 4.08E-13     |
| 1000.00 | 3.38E-14   | 2.23E-13  | 2.42E-12   | 9.94E-13   | 4.92E-13    | 7.94E-13     |
| 1100.00 | 7.36E-14   | 4.18E-13  | 3.42E-12   | 1.50E-12   | 8.46E-13    | 1.40E-12     |
| 1200.00 | 1.41E-13   | 7.19E-13  | 4.66E-12   | 2.15E-12   | 1.36E-12    | 2.27E-12     |
| 1300.00 | 2.51E-13   | 1.15E-12  | 6.15E-12   | 2.95E-12   | 2.06E-12    | 3.47E-12     |
| 1400.00 | 4.16E-13   | 1.75E-12  | 7.89E-12   | 3.92E-12   | 2.97E-12    | 5.05E-12     |
| 1500.00 | 6.50E-13   | 2.54E-12  | 9.89E-12   | 5.07E-12   | 4.14E-12    | 7.04E-12     |
| 1600.00 | 9.69E-13   | 3.54E-12  | 1.22E-11   | 6.40E-12   | 5.59E-12    | 9.49E-12     |
| 1700.00 | 1.39E-12   | 4.78E-12  | 1.47E-11   | 7.93E-12   | 7.35E-12    | 1.24E-11     |
| 1800.00 | 1.91E-12   | 6.28E-12  | 1.75E-11   | 9.65E-12   | 9.44E-12    | 1.59E-11     |
| 1900.00 | 2.57E-12   | 8.07E-12  | 2.06E-11   | 1.16E-11   | 1.19E-11    | 1.99E-11     |
| 2000.00 | 3.35E-12   | 1.02E-11  | 2.40E-11   | 1.37E-11   | 1.47E-11    | 2.45E-11     |

| T (K)   | Alpha-site (add) | Beta-site (add) |
|---------|------------------|-----------------|
| 250.00  | 2.45E-14         | 1.10E-13        |
| 300.00  | 5.61E-14         | 1.97E-13        |
| 400.00  | 1.90E-13         | 4.84E-13        |
| 500.00  | 4.47E-13         | 9.43E-13        |
| 600.00  | 8.54E-13         | 1.59E-12        |
| 700.00  | 1.43E-12         | 2.43E-12        |
| 800.00  | 2.17E-12         | 3.46E-12        |
| 900.00  | 2.82E-12         | 4.69E-12        |
| 1000.00 | 3.74E-12         | 6.11E-12        |
| 1100.00 | 4.77E-12         | 7.70E-12        |
| 1200.00 | 5.92E-12         | 9.48E-12        |
| 1300.00 | 7.17E-12         | 1.14E-11        |
| 1400.00 | 8.52E-12         | 1.35E-11        |
| 1500.00 | 9.96E-12         | 1.58E-11        |
| 1600.00 | 1.15E-11         | 1.82E-11        |
| 1700.00 | 1.31E-11         | 2.08E-11        |
| 1800.00 | 1.47E-11         | 2.35E-11        |
| 1900.00 | 1.64E-11         | 2.63E-11        |
| 2000.00 | 1.82E-11         | 2.92E-11        |

### S7.2. (*E*)-2mhex

| T (K)   | Alpha-site | Beta-site | Gamma-site | Delta-site | Methyl-site | Epsilon-site |
|---------|------------|-----------|------------|------------|-------------|--------------|
| 250.00  | 7.36E-25   | 3.86E-23  | 2.63E-15   | 4.35E-17   | 2.82E-18    | 1.42E-18     |
| 300.00  | 1.27E-22   | 2.85E-21  | 7.76E-15   | 2.75E-16   | 2.29E-17    | 1.51E-17     |
| 400.00  | 7.23E-20   | 5.79E-19  | 3.74E-14   | 3.63E-15   | 4.84E-16    | 4.45E-16     |
| 500.00  | 4.58E-18   | 2.07E-17  | 1.12E-13   | 2.03E-14   | 3.95E-15    | 4.31E-15     |
| 600.00  | 7.87E-17   | 2.45E-16  | 2.55E-13   | 7.05E-14   | 1.85E-14    | 2.22E-14     |
| 700.00  | 6.29E-16   | 1.51E-15  | 4.90E-13   | 1.82E-13   | 6.06E-14    | 7.69E-14     |
| 800.00  | 3.09E-15   | 6.16E-15  | 8.41E-13   | 3.89E-13   | 1.57E-13    | 2.06E-13     |
| 900.00  | 1.09E-14   | 1.89E-14  | 1.33E-12   | 7.24E-13   | 3.44E-13    | 4.59E-13     |
| 1000.00 | 3.06E-14   | 4.75E-14  | 1.97E-12   | 1.22E-12   | 6.64E-13    | 8.96E-13     |
| 1100.00 | 7.21E-14   | 1.03E-13  | 2.79E-12   | 1.91E-12   | 1.17E-12    | 1.58E-12     |
| 1200.00 | 1.49E-13   | 1.98E-13  | 3.80E-12   | 2.81E-12   | 1.90E-12    | 2.59E-12     |
| 1300.00 | 2.79E-13   | 3.50E-13  | 5.01E-12   | 3.96E-12   | 2.92E-12    | 3.98E-12     |

|         |          |          |          |          |          |          |
|---------|----------|----------|----------|----------|----------|----------|
| 1400.00 | 4.81E-13 | 5.76E-13 | 6.44E-12 | 5.37E-12 | 4.27E-12 | 5.82E-12 |
| 1500.00 | 7.78E-13 | 8.95E-13 | 8.09E-12 | 7.05E-12 | 6.00E-12 | 8.17E-12 |
| 1600.00 | 1.19E-12 | 1.33E-12 | 9.98E-12 | 9.02E-12 | 8.14E-12 | 1.11E-11 |
| 1700.00 | 1.75E-12 | 1.89E-12 | 1.21E-11 | 1.13E-11 | 1.08E-11 | 1.46E-11 |
| 1800.00 | 2.47E-12 | 2.61E-12 | 1.45E-11 | 1.39E-11 | 1.38E-11 | 1.88E-11 |
| 1900.00 | 3.38E-12 | 3.49E-12 | 1.71E-11 | 1.68E-11 | 1.75E-11 | 2.37E-11 |
| 2000.00 | 4.50E-12 | 4.57E-12 | 2.00E-11 | 2.00E-11 | 2.16E-11 | 2.93E-11 |

| T (K)   | Alpha-site (add) | Beta-site (add) |
|---------|------------------|-----------------|
| 250.00  | 3.55E-14         | 5.66E-14        |
| 300.00  | 8.01E-14         | 1.23E-13        |
| 400.00  | 2.59E-13         | 3.74E-13        |
| 500.00  | 5.83E-13         | 8.09E-13        |
| 600.00  | 1.07E-12         | 1.44E-12        |
| 700.00  | 1.71E-12         | 2.26E-12        |
| 800.00  | 2.52E-12         | 3.26E-12        |
| 900.00  | 3.49E-12         | 4.44E-12        |
| 1000.00 | 4.62E-12         | 5.80E-12        |
| 1100.00 | 5.90E-12         | 7.31E-12        |
| 1200.00 | 7.33E-12         | 8.99E-12        |
| 1300.00 | 8.91E-12         | 9.16E-12        |
| 1400.00 | 1.06E-11         | 1.06E-11        |
| 1500.00 | 1.25E-11         | 1.20E-11        |
| 1600.00 | 1.45E-11         | 1.35E-11        |
| 1700.00 | 1.66E-11         | 1.51E-11        |
| 1800.00 | 1.88E-11         | 1.67E-11        |
| 1900.00 | 2.11E-11         | 1.83E-11        |
| 2000.00 | 2.36E-11         | 2.00E-11        |

### S7.3. (Z)-3mhx

| T (K)   | Alpha-site | Beta-site | Gamma-site | Delta-site | Methyl-site | Epsilon-site |
|---------|------------|-----------|------------|------------|-------------|--------------|
| 250.00  | 4.09E-15   | 3.71E-22  | 4.67E-21   | 4.39E-15   | 2.73E-18    | 8.61E-19     |
| 300.00  | 9.85E-15   | 1.84E-20  | 1.54E-19   | 1.26E-14   | 2.20E-17    | 1.02E-17     |
| 400.00  | 3.88E-14   | 3.20E-18  | 1.67E-17   | 5.95E-14   | 5.27E-16    | 3.31E-16     |
| 500.00  | 1.07E-13   | 8.34E-17  | 2.56E-16   | 1.78E-13   | 4.66E-15    | 3.38E-15     |
| 600.00  | 2.39E-13   | 8.00E-16  | 2.05E-15   | 4.05E-13   | 2.30E-14    | 1.79E-14     |
| 700.00  | 4.56E-13   | 4.26E-15  | 9.66E-15   | 7.76E-13   | 7.81E-14    | 6.36E-14     |
| 800.00  | 7.82E-13   | 1.56E-14  | 3.22E-14   | 1.32E-12   | 2.07E-13    | 1.73E-13     |
| 900.00  | 1.24E-12   | 4.40E-14  | 8.49E-14   | 2.07E-12   | 4.61E-13    | 3.93E-13     |
| 1000.00 | 1.84E-12   | 1.04E-13  | 1.89E-13   | 3.03E-12   | 9.01E-13    | 7.78E-13     |
| 1100.00 | 2.61E-12   | 2.13E-13  | 3.70E-13   | 4.24E-12   | 1.59E-12    | 1.39E-12     |
| 1200.00 | 3.55E-12   | 3.95E-13  | 6.59E-13   | 5.70E-12   | 2.61E-12    | 2.31E-12     |
| 1300.00 | 4.68E-12   | 6.74E-13  | 1.09E-12   | 7.43E-12   | 4.02E-12    | 3.59E-12     |
| 1400.00 | 6.00E-12   | 1.08E-12  | 1.69E-12   | 9.43E-12   | 5.89E-12    | 5.30E-12     |
| 1500.00 | 7.52E-12   | 1.64E-12  | 2.49E-12   | 1.17E-11   | 8.27E-12    | 7.52E-12     |
| 1600.00 | 9.25E-12   | 2.38E-12  | 3.53E-12   | 1.43E-11   | 1.12E-11    | 1.03E-11     |
| 1700.00 | 1.12E-11   | 3.33E-12  | 4.84E-12   | 1.71E-11   | 1.48E-11    | 1.37E-11     |
| 1800.00 | 1.33E-11   | 4.52E-12  | 6.44E-12   | 2.03E-11   | 1.90E-11    | 1.78E-11     |
| 1900.00 | 1.57E-11   | 5.97E-12  | 8.35E-12   | 2.37E-11   | 2.39E-11    | 2.26E-11     |
| 2000.00 | 1.83E-11   | 7.72E-12  | 1.06E-11   | 2.75E-11   | 2.96E-11    | 2.81E-11     |

| T (K)   | Beta-site (add) | Gamma-site (add) |
|---------|-----------------|------------------|
| 250.00  | 9.81E-14        | 8.84E-14         |
| 300.00  | 1.76E-13        | 1.60E-13         |
| 400.00  | 4.23E-13        | 3.77E-13         |
| 500.00  | 8.02E-13        | 6.88E-13         |
| 600.00  | 1.32E-12        | 1.08E-12         |
| 700.00  | 1.98E-12        | 1.55E-12         |
| 800.00  | 2.79E-12        | 2.07E-12         |
| 900.00  | 3.32E-12        | 2.64E-12         |
| 1000.00 | 4.21E-12        | 3.27E-12         |
| 1100.00 | 5.18E-12        | 3.91E-12         |
| 1200.00 | 6.24E-12        | 4.60E-12         |
| 1300.00 | 7.39E-12        | 5.32E-12         |
| 1400.00 | 8.63E-12        | 6.04E-12         |
| 1500.00 | 9.96E-12        | 6.80E-12         |
| 1600.00 | 1.14E-11        | 7.59E-12         |
| 1700.00 | 1.28E-11        | 8.37E-12         |
| 1800.00 | 1.44E-11        | 9.16E-12         |

|         |          |          |
|---------|----------|----------|
| 1900.00 | 1.60E-11 | 9.97E-12 |
| 2000.00 | 1.77E-11 | 1.08E-11 |

## S7.4. (E)-3mhex

| T (K)   | Alpha-site | Beta-site | Gamma-site | Delta-site | Methyl-site | Epsilon-site |
|---------|------------|-----------|------------|------------|-------------|--------------|
| 250.00  | 2.43E-15   | 1.18E-22  | 3.33E-21   | 2.98E-15   | 1.96E-18    | 1.86E-18     |
| 300.00  | 6.48E-15   | 7.27E-21  | 1.17E-19   | 9.19E-15   | 1.73E-17    | 1.68E-17     |
| 400.00  | 2.90E-14   | 1.71E-18  | 9.75E-18   | 4.67E-14   | 4.09E-16    | 3.94E-16     |
| 500.00  | 8.66E-14   | 5.38E-17  | 2.02E-16   | 1.44E-13   | 3.57E-15    | 3.36E-15     |
| 600.00  | 2.02E-13   | 5.83E-16  | 1.68E-15   | 3.34E-13   | 1.74E-14    | 1.59E-14     |
| 700.00  | 4.02E-13   | 3.37E-15  | 8.04E-15   | 6.50E-13   | 5.81E-14    | 5.21E-14     |
| 800.00  | 7.10E-13   | 1.30E-14  | 2.72E-14   | 1.12E-12   | 1.54E-13    | 1.34E-13     |
| 900.00  | 1.15E-12   | 3.84E-14  | 7.22E-14   | 1.77E-12   | 3.41E-13    | 2.91E-13     |
| 1000.00 | 1.75E-12   | 9.32E-14  | 1.61E-13   | 2.62E-12   | 6.69E-13    | 5.59E-13     |
| 1100.00 | 2.53E-12   | 1.96E-13  | 3.17E-13   | 3.70E-12   | 1.19E-12    | 9.14E-13     |
| 1200.00 | 3.49E-12   | 3.68E-13  | 5.66E-13   | 5.01E-12   | 1.96E-12    | 1.48E-12     |
| 1300.00 | 4.66E-12   | 6.36E-13  | 9.36E-13   | 6.58E-12   | 3.04E-12    | 2.26E-12     |
| 1400.00 | 6.05E-12   | 1.03E-12  | 1.45E-12   | 8.40E-12   | 4.48E-12    | 3.30E-12     |
| 1500.00 | 7.65E-12   | 1.57E-12  | 2.15E-12   | 1.05E-11   | 6.34E-12    | 4.63E-12     |
| 1600.00 | 9.49E-12   | 2.29E-12  | 3.05E-12   | 1.29E-11   | 8.68E-12    | 6.30E-12     |
| 1700.00 | 1.16E-11   | 3.21E-12  | 4.18E-12   | 1.55E-11   | 1.15E-11    | 8.35E-12     |
| 1800.00 | 1.39E-11   | 4.36E-12  | 5.57E-12   | 1.85E-11   | 1.49E-11    | 1.08E-11     |
| 1900.00 | 1.64E-11   | 5.76E-12  | 7.24E-12   | 2.17E-11   | 1.89E-11    | 1.37E-11     |
| 2000.00 | 1.92E-11   | 7.44E-12  | 9.20E-12   | 2.52E-11   | 2.36E-11    | 1.71E-11     |

| T (K)   | Beta-site (add) | Gamma-site |
|---------|-----------------|------------|
| 250.00  | 8.38E-14        | 1.07E-13   |
| 300.00  | 1.75E-13        | 2.23E-13   |
| 400.00  | 5.06E-13        | 6.45E-13   |
| 500.00  | 1.07E-12        | 1.34E-12   |
| 600.00  | 1.87E-12        | 2.30E-12   |
| 700.00  | 2.90E-12        | 3.52E-12   |
| 800.00  | 4.18E-12        | 4.97E-12   |
| 900.00  | 5.67E-12        | 6.64E-12   |
| 1000.00 | 7.38E-12        | 8.51E-12   |
| 1100.00 | 9.28E-12        | 1.06E-11   |
| 1200.00 | 1.14E-11        | 1.28E-11   |
| 1300.00 | 1.37E-11        | 1.52E-11   |
| 1400.00 | 1.61E-11        | 1.77E-11   |
| 1500.00 | 1.87E-11        | 2.04E-11   |
| 1600.00 | 2.15E-11        | 2.32E-11   |
| 1700.00 | 2.44E-11        | 2.61E-11   |
| 1800.00 | 2.74E-11        | 2.92E-11   |
| 1900.00 | 3.06E-11        | 3.24E-11   |
| 2000.00 | 3.39E-11        | 3.56E-11   |

## S7.5. (Z)-4mhex

| T (K)   | Alpha-site | Beta-site | Gamma-site | Delta-site | Methyl-site | Epsilon-site |
|---------|------------|-----------|------------|------------|-------------|--------------|
| 250.00  | 1.14E-16   | 1.31E-15  | 6.96E-21   | 1.15E-20   | 2.08E-18    | 6.76E-16     |
| 300.00  | 4.95E-16   | 4.21E-15  | 1.41E-19   | 3.13E-19   | 1.80E-17    | 2.47E-15     |
| 400.00  | 4.24E-15   | 2.32E-14  | 1.33E-17   | 1.84E-17   | 4.21E-16    | 1.71E-14     |
| 500.00  | 1.90E-14   | 7.65E-14  | 2.48E-16   | 3.22E-16   | 3.68E-15    | 6.77E-14     |
| 600.00  | 5.83E-14   | 1.87E-13  | 1.93E-15   | 2.40E-15   | 1.81E-14    | 1.92E-13     |
| 700.00  | 1.41E-13   | 3.80E-13  | 8.89E-15   | 1.08E-14   | 6.15E-14    | 4.39E-13     |
| 800.00  | 2.88E-13   | 6.79E-13  | 2.92E-14   | 3.47E-14   | 1.64E-13    | 8.64E-13     |
| 900.00  | 5.25E-13   | 1.11E-12  | 7.61E-14   | 8.91E-14   | 3.66E-13    | 1.53E-12     |
| 1000.00 | 8.75E-13   | 1.68E-12  | 1.68E-13   | 1.95E-13   | 7.17E-13    | 2.48E-12     |
| 1100.00 | 1.36E-12   | 2.43E-12  | 3.27E-13   | 3.76E-13   | 1.28E-12    | 3.79E-12     |
| 1200.00 | 2.01E-12   | 3.35E-12  | 5.79E-13   | 6.61E-13   | 2.10E-12    | 5.51E-12     |
| 1300.00 | 2.83E-12   | 4.48E-12  | 9.52E-13   | 1.08E-12   | 3.25E-12    | 7.67E-12     |
| 1400.00 | 3.84E-12   | 5.81E-12  | 1.47E-12   | 1.66E-12   | 4.79E-12    | 1.03E-11     |
| 1500.00 | 5.07E-12   | 7.36E-12  | 2.17E-12   | 2.44E-12   | 6.76E-12    | 1.35E-11     |
| 1600.00 | 6.52E-12   | 9.14E-12  | 3.08E-12   | 3.45E-12   | 9.23E-12    | 1.73E-11     |
| 1700.00 | 8.20E-12   | 1.12E-11  | 4.21E-12   | 4.70E-12   | 1.22E-11    | 2.16E-11     |
| 1800.00 | 1.01E-11   | 1.34E-11  | 5.60E-12   | 6.24E-12   | 1.58E-11    | 2.66E-11     |
| 1900.00 | 1.23E-11   | 1.59E-11  | 7.26E-12   | 8.07E-12   | 2.00E-11    | 3.22E-11     |

2000.00 1.47E-11 1.87E-11 9.22E-12 1.02E-11 2.48E-11 3.84E-11

| T (K)   | Gamma-site | (add) Delta-site |
|---------|------------|------------------|
| 250.00  | 1.51E-13   | 7.69E-14         |
| 300.00  | 2.69E-13   | 1.62E-13         |
| 400.00  | 6.42E-13   | 4.75E-13         |
| 500.00  | 1.21E-12   | 1.01E-12         |
| 600.00  | 1.99E-12   | 1.76E-12         |
| 700.00  | 2.96E-12   | 2.74E-12         |
| 800.00  | 4.15E-12   | 3.92E-12         |
| 900.00  | 5.52E-12   | 5.31E-12         |
| 1000.00 | 7.09E-12   | 6.88E-12         |
| 1100.00 | 8.84E-12   | 8.62E-12         |
| 1200.00 | 1.08E-11   | 1.05E-11         |
| 1300.00 | 1.28E-11   | 1.26E-11         |
| 1400.00 | 1.51E-11   | 1.48E-11         |
| 1500.00 | 1.75E-11   | 1.72E-11         |
| 1600.00 | 2.00E-11   | 1.97E-11         |
| 1700.00 | 2.27E-11   | 2.23E-11         |
| 1800.00 | 2.55E-11   | 2.50E-11         |
| 1900.00 | 2.84E-11   | 2.79E-11         |
| 2000.00 | 3.15E-11   | 3.09E-11         |

## S7.6. (E)-4mhex

| T (K)   | Alpha-site | Beta-site | Gamma-site | Delta-site | Methyl-site | Epsilon-site |
|---------|------------|-----------|------------|------------|-------------|--------------|
| 250.00  | 7.76E-17   | 1.18E-15  | 1.96E-21   | 2.48E-21   | 2.00E-18    | 9.56E-16     |
| 300.00  | 3.62E-16   | 4.03E-15  | 7.44E-20   | 6.13E-20   | 1.77E-17    | 3.38E-15     |
| 400.00  | 3.37E-15   | 2.34E-14  | 7.34E-18   | 7.15E-18   | 4.19E-16    | 2.18E-14     |
| 500.00  | 1.58E-14   | 7.86E-14  | 1.59E-16   | 1.49E-16   | 3.68E-15    | 8.10E-14     |
| 600.00  | 4.96E-14   | 1.94E-13  | 1.36E-15   | 1.24E-15   | 1.81E-14    | 2.19E-13     |
| 700.00  | 1.22E-13   | 3.93E-13  | 6.64E-15   | 5.92E-15   | 6.13E-14    | 4.81E-13     |
| 800.00  | 2.51E-13   | 7.01E-13  | 2.27E-14   | 1.99E-14   | 1.62E-13    | 9.19E-13     |
| 900.00  | 4.60E-13   | 1.14E-12  | 6.09E-14   | 5.29E-14   | 3.61E-13    | 1.59E-12     |
| 1000.00 | 7.69E-13   | 1.73E-12  | 1.37E-13   | 1.18E-13   | 7.05E-13    | 2.54E-12     |
| 1100.00 | 1.20E-12   | 2.48E-12  | 2.71E-13   | 2.32E-13   | 1.25E-12    | 3.83E-12     |
| 1200.00 | 1.77E-12   | 3.43E-12  | 4.86E-13   | 4.15E-13   | 2.05E-12    | 5.50E-12     |
| 1300.00 | 2.49E-12   | 4.56E-12  | 8.06E-13   | 6.86E-13   | 3.15E-12    | 7.59E-12     |
| 1400.00 | 3.39E-12   | 5.91E-12  | 1.26E-12   | 1.07E-12   | 4.62E-12    | 1.02E-11     |
| 1500.00 | 4.48E-12   | 7.48E-12  | 1.86E-12   | 1.58E-12   | 6.51E-12    | 1.32E-11     |
| 1600.00 | 5.76E-12   | 9.28E-12  | 2.65E-12   | 2.25E-12   | 8.85E-12    | 1.69E-11     |
| 1700.00 | 7.25E-12   | 1.13E-11  | 3.64E-12   | 3.09E-12   | 1.17E-11    | 2.10E-11     |
| 1800.00 | 8.95E-12   | 1.36E-11  | 4.85E-12   | 4.13E-12   | 1.51E-11    | 2.58E-11     |
| 1900.00 | 1.09E-11   | 1.61E-11  | 6.31E-12   | 5.38E-12   | 1.90E-11    | 3.12E-11     |
| 2000.00 | 1.30E-11   | 1.89E-11  | 8.02E-12   | 6.86E-12   | 2.35E-11    | 3.72E-11     |

| T (K)   | Gamma-site | (add) Delta-site |
|---------|------------|------------------|
| 250.00  | 1.38E-13   | 1.06E-13         |
| 300.00  | 2.72E-13   | 2.18E-13         |
| 400.00  | 7.22E-13   | 6.11E-13         |
| 500.00  | 1.42E-12   | 1.24E-12         |
| 600.00  | 2.37E-12   | 2.10E-12         |
| 700.00  | 3.53E-12   | 3.17E-12         |
| 800.00  | 4.91E-12   | 4.44E-12         |
| 900.00  | 6.49E-12   | 5.89E-12         |
| 1000.00 | 8.24E-12   | 7.51E-12         |
| 1100.00 | 1.02E-11   | 9.28E-12         |
| 1200.00 | 1.22E-11   | 1.12E-11         |
| 1300.00 | 1.45E-11   | 1.32E-11         |
| 1400.00 | 1.68E-11   | 1.39E-11         |
| 1500.00 | 1.93E-11   | 1.57E-11         |
| 1600.00 | 2.20E-11   | 1.76E-11         |
| 1700.00 | 2.47E-11   | 1.95E-11         |
| 1800.00 | 2.76E-11   | 2.14E-11         |
| 1900.00 | 3.05E-11   | 2.34E-11         |
| 2000.00 | 3.36E-11   | 2.55E-11         |

## S7.7. 5mhex

| T (K)   | Alpha-site | Beta-site | Gamma-site | Delta-site | Methyl-site | Epsilon1-site | Epsilon2-site |
|---------|------------|-----------|------------|------------|-------------|---------------|---------------|
| 250.00  | 9.34E-17   | 1.48E-17  | 1.82E-15   | 9.58E-21   | 2.09E-18    | 4.57E-24      | 6.77E-24      |
| 300.00  | 4.30E-16   | 1.04E-16  | 5.65E-15   | 2.58E-19   | 1.72E-17    | 5.09E-22      | 6.32E-22      |
| 400.00  | 3.90E-15   | 1.64E-15  | 2.92E-14   | 2.21E-17   | 3.75E-16    | 2.38E-19      | 2.46E-19      |
| 500.00  | 1.79E-14   | 1.04E-14  | 9.18E-14   | 3.85E-16   | 3.13E-15    | 1.11E-17      | 7.23E-18      |
| 600.00  | 5.56E-14   | 3.96E-14  | 2.17E-13   | 2.84E-15   | 1.49E-14    | 1.36E-16      | 9.35E-17      |
| 700.00  | 1.35E-13   | 1.11E-13  | 4.30E-13   | 1.24E-14   | 4.94E-14    | 9.41E-16      | 6.16E-16      |
| 800.00  | 2.76E-13   | 2.24E-13  | 7.53E-13   | 3.57E-14   | 1.29E-13    | 4.19E-15      | 2.64E-15      |
| 900.00  | 5.00E-13   | 4.36E-13  | 1.21E-12   | 8.98E-14   | 2.83E-13    | 1.38E-14      | 8.48E-15      |
| 1000.00 | 8.31E-13   | 7.64E-13  | 1.81E-12   | 1.93E-13   | 5.48E-13    | 3.67E-14      | 2.21E-14      |
| 1100.00 | 1.29E-12   | 1.23E-12  | 2.58E-12   | 3.69E-13   | 9.62E-13    | 8.33E-14      | 4.94E-14      |
| 1200.00 | 1.89E-12   | 1.87E-12  | 3.54E-12   | 6.43E-13   | 1.57E-12    | 1.67E-13      | 9.82E-14      |
| 1300.00 | 2.65E-12   | 2.70E-12  | 4.68E-12   | 1.04E-12   | 2.41E-12    | 3.06E-13      | 1.78E-13      |
| 1400.00 | 3.59E-12   | 3.74E-12  | 6.03E-12   | 1.60E-12   | 3.52E-12    | 5.19E-13      | 3.00E-13      |
| 1500.00 | 4.72E-12   | 5.01E-12  | 7.59E-12   | 2.34E-12   | 4.93E-12    | 8.27E-13      | 4.75E-13      |
| 1600.00 | 6.04E-12   | 6.52E-12  | 9.36E-12   | 3.28E-12   | 6.69E-12    | 1.25E-12      | 7.18E-13      |
| 1700.00 | 7.57E-12   | 8.28E-12  | 1.14E-11   | 4.46E-12   | 8.82E-12    | 1.82E-12      | 1.04E-12      |
| 1800.00 | 9.31E-12   | 1.03E-11  | 1.36E-11   | 5.90E-12   | 1.14E-11    | 2.56E-12      | 1.45E-12      |
| 1900.00 | 1.13E-11   | 1.26E-11  | 1.60E-11   | 7.61E-12   | 1.43E-11    | 3.48E-12      | 1.97E-12      |
| 2000.00 | 1.35E-11   | 1.52E-11  | 1.87E-11   | 9.63E-12   | 1.77E-11    | 4.61E-12      | 2.61E-12      |

| T (K)   | Delta-site (add) | Epsilon-site (add) |
|---------|------------------|--------------------|
| 250.00  | 2.23E-14         | 5.64E-13           |
| 300.00  | 5.49E-14         | 8.75E-13           |
| 400.00  | 1.94E-13         | 1.65E-12           |
| 500.00  | 4.56E-13         | 2.57E-12           |
| 600.00  | 8.54E-13         | 3.64E-12           |
| 700.00  | 1.40E-12         | 4.84E-12           |
| 800.00  | 2.08E-12         | 6.13E-12           |
| 900.00  | 2.90E-12         | 7.54E-12           |
| 1000.00 | 3.86E-12         | 9.07E-12           |
| 1100.00 | 4.95E-12         | 1.07E-11           |
| 1200.00 | 5.59E-12         | 1.25E-11           |
| 1300.00 | 6.70E-12         | 1.43E-11           |
| 1400.00 | 7.89E-12         | 1.62E-11           |
| 1500.00 | 9.14E-12         | 1.82E-11           |
| 1600.00 | 1.04E-11         | 2.03E-11           |
| 1700.00 | 1.18E-11         | 2.25E-11           |
| 1800.00 | 1.33E-11         | 2.48E-11           |
| 1900.00 | 1.48E-11         | 2.71E-11           |
| 2000.00 | 1.64E-11         | 2.96E-11           |

## S8. Fit Parameters MS-CVT/SCT Rate Constants

To facilitate the use of rate constants for each reaction site of the isomers studied, we performed fits using various analytical functions implemented in the Pilgrim code, as shown in Table S1. Note that addition reactions and abstractions at methylenic carbons were not weighted here. In such cases, the pre-exponential factor  $A$  can be multiplied by 2.

Table S1.: Analytical expressions for rate constants and corresponding parameters.

| Label                  | Equation                                                       | Parameters     | Units                                                              |
|------------------------|----------------------------------------------------------------|----------------|--------------------------------------------------------------------|
| analytic1              | $k = Ae^{-B/T}$                                                | $A, B$         | $A$ : molecule $\text{cm}^{-3} \text{s}^{-1}$<br>$B$ : K           |
| analytic2              | $k = AT^n e^{-B/T}$                                            | $A, B, n$      | $AT^n$ : molecule $\text{cm}^{-3} \text{s}^{-1}$<br>$B$ : K        |
| analytic3              | $k = A \left(\frac{T}{300}\right)^n e^{-B/T}$                  | $A, B, n, T_r$ | $A$ : molecule $\text{cm}^{-3} \text{s}^{-1}$<br>$B$ : K           |
| analytic4 <sup>a</sup> | $k = A \left(\frac{T}{300}\right)^n e^{-B(T+T_0)/(T^2+T_0^2)}$ | $A, B, n, T_0$ | $A$ : molecule $\text{cm}^{-3} \text{s}^{-1}$<br>$B$ and $T_0$ : K |

<sup>a</sup>J. Zheng and D. G. Truhlar, \*Phys. Chem. Chem. Phys.\*<sup>\*</sup>, 2010, **12**, 7782–7793.

## S8.1. (Z)-2mhex

### Alpha-site

|           |            |            |            |            |            |                               |
|-----------|------------|------------|------------|------------|------------|-------------------------------|
| analytic1 | 9.0815E-11 | 7.5489E+03 |            |            |            | # r <sup>2</sup> = 0.84383905 |
| analytic2 | 9.2421E-16 | 6.6309E+03 | 1.5031E+00 |            |            | # r <sup>2</sup> = 0.99307036 |
| analytic3 | 4.8869E-12 | 6.6309E+03 | 1.5031E+00 | 3.0000E+02 |            | # r <sup>2</sup> = 0.99307036 |
| analytic4 | 4.9974E-13 | 5.0448E+03 | 2.3567E+00 | 3.0000E+02 | 7.7301E+01 | # r <sup>2</sup> = 0.99746765 |

### Beta-site

|           |            |            |            |            |            |                               |
|-----------|------------|------------|------------|------------|------------|-------------------------------|
| analytic1 | 9.8749E-11 | 5.7939E+03 |            |            |            | # r <sup>2</sup> = 0.75199015 |
| analytic2 | 2.1110E-19 | 4.1997E+03 | 2.6103E+00 |            |            | # r <sup>2</sup> = 0.99765679 |
| analytic3 | 6.1732E-13 | 4.1997E+03 | 2.6103E+00 | 3.0000E+02 |            | # r <sup>2</sup> = 0.99765679 |
| analytic4 | 3.3237E-13 | 3.3473E+03 | 2.7489E+00 | 3.0000E+02 | 1.2755E+02 | # r <sup>2</sup> = 0.99964381 |

### Gamma-site

|           |            |            |            |            |            |                               |
|-----------|------------|------------|------------|------------|------------|-------------------------------|
| analytic1 | 4.3912E-11 | 2.5679E+03 |            |            |            | # r <sup>2</sup> = 0.70055517 |
| analytic2 | 1.6386E-20 | 8.3431E+02 | 2.8385E+00 |            |            | # r <sup>2</sup> = 0.99733257 |
| analytic3 | 1.7614E-13 | 8.3431E+02 | 2.8385E+00 | 3.0000E+02 |            | # r <sup>2</sup> = 0.99733257 |
| analytic4 | 2.9585E-13 | 8.6900E+02 | 2.5749E+00 | 3.0000E+02 | 1.9863E+02 | # r <sup>2</sup> = 0.99975370 |

### Delta-site

|           |            |            |            |            |            |                               |
|-----------|------------|------------|------------|------------|------------|-------------------------------|
| analytic1 | 4.1646E-11 | 3.4385E+03 |            |            |            | # r <sup>2</sup> = 0.75507057 |
| analytic2 | 2.4068E-19 | 1.9237E+03 | 2.4803E+00 |            |            | # r <sup>2</sup> = 0.99904620 |
| analytic3 | 3.3523E-13 | 1.9237E+03 | 2.4803E+00 | 3.0000E+02 |            | # r <sup>2</sup> = 0.99904620 |
| analytic4 | 2.8886E-13 | 1.5713E+03 | 2.4812E+00 | 3.0000E+02 | 1.3744E+02 | # r <sup>2</sup> = 0.99988940 |

### Methyl-site

|           |            |            |            |            |            |                               |
|-----------|------------|------------|------------|------------|------------|-------------------------------|
| analytic1 | 6.4009E-11 | 4.4998E+03 |            |            |            | # r <sup>2</sup> = 0.65224859 |
| analytic2 | 4.8426E-22 | 2.4549E+03 | 3.3483E+00 |            |            | # r <sup>2</sup> = 0.99311495 |
| analytic3 | 9.5306E-14 | 2.4549E+03 | 3.3483E+00 | 3.0000E+02 |            | # r <sup>2</sup> = 0.99311495 |
| analytic4 | 1.6249E-13 | 2.2285E+03 | 3.0190E+00 | 3.0000E+02 | 1.6867E+02 | # r <sup>2</sup> = 0.99960575 |

### Epsilon-site

|           |            |            |            |            |            |                               |
|-----------|------------|------------|------------|------------|------------|-------------------------------|
| analytic1 | 1.5457E-10 | 4.9702E+03 |            |            |            | # r <sup>2</sup> = 0.73599743 |
| analytic2 | 6.6305E-20 | 3.2478E+03 | 2.8203E+00 |            |            | # r <sup>2</sup> = 0.99297827 |
| analytic3 | 6.4237E-13 | 3.2478E+03 | 2.8203E+00 | 3.0000E+02 |            | # r <sup>2</sup> = 0.99297827 |
| analytic4 | 8.2727E-13 | 2.8050E+03 | 2.5905E+00 | 3.0000E+02 | 1.5541E+02 | # r <sup>2</sup> = 0.99949140 |

### Alpha-site (add)

|           |            |            |            |            |            |                               |
|-----------|------------|------------|------------|------------|------------|-------------------------------|
| analytic1 | 3.2035E-11 | 1.9400E+03 |            |            |            | # r <sup>2</sup> = 0.85811294 |
| analytic2 | 9.9861E-17 | 9.2756E+02 | 1.6578E+00 |            |            | # r <sup>2</sup> = 0.99953168 |
| analytic3 | 1.2761E-12 | 9.2756E+02 | 1.6578E+00 | 3.0000E+02 |            | # r <sup>2</sup> = 0.99953168 |
| analytic4 | 1.5607E-12 | 8.4189E+02 | 1.5334E+00 | 3.0000E+02 | 1.6850E+02 | # r <sup>2</sup> = 0.99995117 |

Beta-site (add)

|           |            |            |            |            |            |                               |
|-----------|------------|------------|------------|------------|------------|-------------------------------|
| analytic1 | 4.0567E-11 | 1.6495E+03 |            |            |            | # r <sup>2</sup> = 0.79559985 |
| analytic2 | 6.5440E-18 | 4.0058E+02 | 2.0450E+00 |            |            | # r <sup>2</sup> = 0.99910347 |
| analytic3 | 7.6117E-13 | 4.0058E+02 | 2.0450E+00 | 3.0000E+02 |            | # r <sup>2</sup> = 0.99910347 |
| analytic4 | 1.0751E-12 | 4.5009E+02 | 1.8755E+00 | 3.0000E+02 | 2.1264E+02 | # r <sup>2</sup> = 0.99993653 |

## S8.2. (E)-2mhx

Alpha-site

|           |            |            |            |            |            |                               |
|-----------|------------|------------|------------|------------|------------|-------------------------------|
| analytic1 | 1.8684E-10 | 8.4828E+03 |            |            |            | # r <sup>2</sup> = 0.81679995 |
| analytic2 | 7.1295E-18 | 7.1187E+03 | 2.2335E+00 |            |            | # r <sup>2</sup> = 0.99619906 |
| analytic3 | 2.4301E-12 | 7.1187E+03 | 2.2335E+00 | 3.0000E+02 |            | # r <sup>2</sup> = 0.99619906 |
| analytic4 | 5.1956E-13 | 5.5451E+03 | 2.7001E+00 | 3.0000E+02 | 1.1597E+02 | # r <sup>2</sup> = 0.99852337 |

Beta-site

|           |            |            |            |            |            |                               |
|-----------|------------|------------|------------|------------|------------|-------------------------------|
| analytic1 | 9.9393E-11 | 7.3692E+03 |            |            |            | # r <sup>2</sup> = 0.76460515 |
| analytic2 | 2.0390E-19 | 5.7717E+03 | 2.6157E+00 |            |            | # r <sup>2</sup> = 0.99504799 |
| analytic3 | 6.1487E-13 | 5.7717E+03 | 2.6157E+00 | 3.0000E+02 |            | # r <sup>2</sup> = 0.99504799 |
| analytic4 | 2.4193E-13 | 4.5780E+03 | 2.8445E+00 | 3.0000E+02 | 1.2542E+02 | # r <sup>2</sup> = 0.99890404 |

Gamma-site

|           |            |            |            |            |            |                               |
|-----------|------------|------------|------------|------------|------------|-------------------------------|
| analytic1 | 3.7713E-11 | 2.6150E+03 |            |            |            | # r <sup>2</sup> = 0.70876798 |
| analytic2 | 3.9826E-20 | 9.6450E+02 | 2.7025E+00 |            |            | # r <sup>2</sup> = 0.99939420 |
| analytic3 | 1.9707E-13 | 9.6450E+02 | 2.7025E+00 | 3.0000E+02 |            | # r <sup>2</sup> = 0.99939420 |
| analytic4 | 1.9374E-13 | 8.0485E+02 | 2.6765E+00 | 3.0000E+02 | 1.4491E+02 | # r <sup>2</sup> = 0.99986079 |

Delta-site

|           |            |            |            |            |            |                               |
|-----------|------------|------------|------------|------------|------------|-------------------------------|
| analytic1 | 7.3257E-11 | 3.8036E+03 |            |            |            | # r <sup>2</sup> = 0.75793597 |
| analytic2 | 2.9642E-19 | 2.2604E+03 | 2.5269E+00 |            |            | # r <sup>2</sup> = 0.99781682 |
| analytic3 | 5.3860E-13 | 2.2604E+03 | 2.5269E+00 | 3.0000E+02 |            | # r <sup>2</sup> = 0.99781682 |
| analytic4 | 5.1520E-13 | 1.8848E+03 | 2.4679E+00 | 3.0000E+02 | 1.4464E+02 | # r <sup>2</sup> = 0.99974221 |

Methyl-site

|           |            |            |            |            |            |                               |
|-----------|------------|------------|------------|------------|------------|-------------------------------|
| analytic1 | 1.0181E-10 | 4.6622E+03 |            |            |            | # r <sup>2</sup> = 0.64890015 |
| analytic2 | 3.8236E-22 | 2.5614E+03 | 3.4398E+00 |            |            | # r <sup>2</sup> = 0.98916428 |
| analytic3 | 1.2687E-13 | 2.5614E+03 | 3.4398E+00 | 3.0000E+02 |            | # r <sup>2</sup> = 0.98916428 |
| analytic4 | 2.7000E-13 | 2.3895E+03 | 3.0064E+00 | 3.0000E+02 | 1.7525E+02 | # r <sup>2</sup> = 0.99920799 |

Epsilon-site

|           |            |            |            |            |            |                               |
|-----------|------------|------------|------------|------------|------------|-------------------------------|
| analytic1 | 1.7206E-10 | 4.9315E+03 |            |            |            | # r <sup>2</sup> = 0.70418317 |
| analytic2 | 1.4395E-20 | 3.0785E+03 | 3.0340E+00 |            |            | # r <sup>2</sup> = 0.99257903 |
| analytic3 | 4.7193E-13 | 3.0785E+03 | 3.0340E+00 | 3.0000E+02 |            | # r <sup>2</sup> = 0.99257903 |
| analytic4 | 6.7923E-13 | 2.6977E+03 | 2.7595E+00 | 3.0000E+02 | 1.5947E+02 | # r <sup>2</sup> = 0.99952593 |

Alpha-site (add)

|           |            |            |            |            |            |                               |
|-----------|------------|------------|------------|------------|------------|-------------------------------|
| analytic1 | 3.8662E-11 | 1.8986E+03 |            |            |            | # r <sup>2</sup> = 0.82973964 |
| analytic2 | 3.6247E-17 | 7.9022E+02 | 1.8149E+00 |            |            | # r <sup>2</sup> = 0.99984246 |
| analytic3 | 1.1347E-12 | 7.9022E+02 | 1.8149E+00 | 3.0000E+02 |            | # r <sup>2</sup> = 0.99984246 |
| analytic4 | 1.0731E-12 | 6.4700E+02 | 1.8128E+00 | 3.0000E+02 | 1.3829E+02 | # r <sup>2</sup> = 0.99998645 |

Beta-site (add)

|           |            |            |            |            |            |                               |
|-----------|------------|------------|------------|------------|------------|-------------------------------|
| analytic1 | 3.5555E-11 | 1.7265E+03 |            |            |            | # r <sup>2</sup> = 0.92218899 |
| analytic2 | 3.0214E-15 | 9.7801E+02 | 1.2256E+00 |            |            | # r <sup>2</sup> = 0.99622108 |
| analytic3 | 3.2816E-12 | 9.7801E+02 | 1.2256E+00 | 3.0000E+02 |            | # r <sup>2</sup> = 0.99622108 |
| analytic4 | 6.3642E-12 | 1.0372E+03 | 8.9229E-01 | 3.0000E+02 | 2.0212E+02 | # r <sup>2</sup> = 0.99805096 |

### S8.3. (Z)-3mhex

#### Alpha-site

|           |            |            |            |            |            |                               |
|-----------|------------|------------|------------|------------|------------|-------------------------------|
| analytic1 | 3.1325E-11 | 2.4913E+03 |            |            |            | # r <sup>2</sup> = 0.68170266 |
| analytic2 | 3.9353E-21 | 6.7079E+02 | 2.9809E+00 |            |            | # r <sup>2</sup> = 0.99622191 |
| analytic3 | 9.5273E-14 | 6.7079E+02 | 2.9809E+00 | 3.0000E+02 |            | # r <sup>2</sup> = 0.99622191 |
| analytic4 | 2.1762E-13 | 8.3979E+02 | 2.5871E+00 | 3.0000E+02 | 2.3068E+02 | # r <sup>2</sup> = 0.99976839 |

#### Beta-site

|           |            |            |            |            |            |                               |
|-----------|------------|------------|------------|------------|------------|-------------------------------|
| analytic1 | 1.3186E-10 | 6.8607E+03 |            |            |            | # r <sup>2</sup> = 0.77285926 |
| analytic2 | 1.0419E-18 | 5.3709E+03 | 2.4394E+00 |            |            | # r <sup>2</sup> = 0.99867559 |
| analytic3 | 1.1493E-12 | 5.3709E+03 | 2.4394E+00 | 3.0000E+02 |            | # r <sup>2</sup> = 0.99867559 |
| analytic4 | 3.4072E-13 | 4.1711E+03 | 2.8160E+00 | 3.0000E+02 | 1.1407E+02 | # r <sup>2</sup> = 0.99949590 |

#### Gamma-site (add)

|           |            |            |            |            |            |                               |
|-----------|------------|------------|------------|------------|------------|-------------------------------|
| analytic1 | 1.2861E-10 | 6.2264E+03 |            |            |            | # r <sup>2</sup> = 0.75435472 |
| analytic2 | 2.6688E-19 | 4.6298E+03 | 2.6142E+00 |            |            | # r <sup>2</sup> = 0.99711352 |
| analytic3 | 7.9791E-13 | 4.6298E+03 | 2.6142E+00 | 3.0000E+02 |            | # r <sup>2</sup> = 0.99711352 |
| analytic4 | 2.5908E-13 | 3.5775E+03 | 2.9755E+00 | 3.0000E+02 | 1.1083E+02 | # r <sup>2</sup> = 0.99785931 |

#### Delta-site (add)

|           |            |            |            |            |            |                               |
|-----------|------------|------------|------------|------------|------------|-------------------------------|
| analytic1 | 5.3431E-11 | 2.5665E+03 |            |            |            | # r <sup>2</sup> = 0.74073064 |
| analytic2 | 2.0427E-19 | 1.0187E+03 | 2.5343E+00 |            |            | # r <sup>2</sup> = 0.99875377 |
| analytic3 | 3.8721E-13 | 1.0187E+03 | 2.5343E+00 | 3.0000E+02 |            | # r <sup>2</sup> = 0.99875377 |
| analytic4 | 4.8317E-13 | 9.2476E+02 | 2.3976E+00 | 3.0000E+02 | 1.6867E+02 | # r <sup>2</sup> = 0.99990173 |

#### Methyl-site

|           |            |            |            |            |            |                               |
|-----------|------------|------------|------------|------------|------------|-------------------------------|
| analytic1 | 1.5199E-10 | 4.7787E+03 |            |            |            | # r <sup>2</sup> = 0.66583469 |
| analytic2 | 8.5781E-22 | 2.7104E+03 | 3.3866E+00 |            |            | # r <sup>2</sup> = 0.98547005 |
| analytic3 | 2.1006E-13 | 2.7104E+03 | 3.3866E+00 | 3.0000E+02 |            | # r <sup>2</sup> = 0.98547005 |
| analytic4 | 6.5164E-13 | 2.6378E+03 | 2.7778E+00 | 3.0000E+02 | 1.8468E+02 | # r <sup>2</sup> = 0.99942742 |

#### Epsilon-site

|           |            |            |            |            |            |                               |
|-----------|------------|------------|------------|------------|------------|-------------------------------|
| analytic1 | 1.7173E-10 | 5.0544E+03 |            |            |            | # r <sup>2</sup> = 0.69182100 |
| analytic2 | 1.0087E-20 | 3.1732E+03 | 3.0803E+00 |            |            | # r <sup>2</sup> = 0.99436296 |
| analytic3 | 4.3051E-13 | 3.1732E+03 | 3.0803E+00 | 3.0000E+02 |            | # r <sup>2</sup> = 0.99436296 |
| analytic4 | 4.8568E-13 | 2.7015E+03 | 2.9136E+00 | 3.0000E+02 | 1.5118E+02 | # r <sup>2</sup> = 0.99952970 |

#### Beta-site (add)

|           |            |            |            |            |            |                               |
|-----------|------------|------------|------------|------------|------------|-------------------------------|
| analytic1 | 2.4312E-11 | 1.5182E+03 |            |            |            | # r <sup>2</sup> = 0.82961909 |
| analytic2 | 6.0894E-17 | 4.8828E+02 | 1.6864E+00 |            |            | # r <sup>2</sup> = 0.99984797 |
| analytic3 | 9.1606E-13 | 4.8828E+02 | 1.6864E+00 | 3.0000E+02 |            | # r <sup>2</sup> = 0.99984797 |
| analytic4 | 9.1623E-13 | 4.1006E+02 | 1.6691E+00 | 3.0000E+02 | 1.4657E+02 | # r <sup>2</sup> = 0.99968512 |

#### Gamma-site (add)

|           |            |            |            |            |            |                               |
|-----------|------------|------------|------------|------------|------------|-------------------------------|
| analytic1 | 1.5701E-11 | 1.4095E+03 |            |            |            | # r <sup>2</sup> = 0.88749731 |
| analytic2 | 4.7691E-16 | 5.7886E+02 | 1.3601E+00 |            |            | # r <sup>2</sup> = 0.99955740 |
| analytic3 | 1.1156E-12 | 5.7886E+02 | 1.3601E+00 | 3.0000E+02 |            | # r <sup>2</sup> = 0.99955740 |
| analytic4 | 1.2285E-12 | 5.1609E+02 | 1.2958E+00 | 3.0000E+02 | 1.6412E+02 | # r <sup>2</sup> = 0.99995204 |

### S8.4. (E)-3mhex

#### Alpha-site

|           |            |            |            |            |            |                               |
|-----------|------------|------------|------------|------------|------------|-------------------------------|
| analytic1 | 3.5401E-11 | 2.6558E+03 |            |            |            | # r <sup>2</sup> = 0.67628795 |
| analytic2 | 3.0151E-21 | 8.0418E+02 | 3.0317E+00 |            |            | # r <sup>2</sup> = 0.99612482 |
| analytic3 | 9.7540E-14 | 8.0418E+02 | 3.0317E+00 | 3.0000E+02 |            | # r <sup>2</sup> = 0.99612482 |
| analytic4 | 1.9522E-13 | 9.0386E+02 | 2.6912E+00 | 3.0000E+02 | 2.1274E+02 | # r <sup>2</sup> = 0.99963156 |

Beta-site  
analytic1 1.5846E-10 7.1845E+03 # r<sup>2</sup> = 0.80563875  
analytic2 5.1031E-18 5.8069E+03 2.2556E+00 # r<sup>2</sup> = 0.99776644  
analytic3 1.9740E-12 5.8069E+03 2.2556E+00 3.0000E+02 # r<sup>2</sup> = 0.99776644  
analytic4 6.0802E-13 4.5434E+03 2.5980E+00 3.0000E+02 1.1845E+02 # r<sup>2</sup> = 0.99942143

Gamma-site  
analytic1 1.1644E-10 6.3005E+03 # r<sup>2</sup> = 0.75792054  
analytic2 1.5901E-19 4.6705E+03 2.6689E+00 # r<sup>2</sup> = 0.99428126  
analytic3 6.4954E-13 4.6705E+03 2.6689E+00 3.0000E+02 # r<sup>2</sup> = 0.99428126  
analytic4 4.0247E-13 3.7813E+03 2.7256E+00 3.0000E+02 1.3414E+02 # r<sup>2</sup> = 0.99907601

Delta-site  
analytic1 5.0522E-11 2.6467E+03 # r<sup>2</sup> = 0.73482556  
analytic2 1.6616E-19 1.0869E+03 2.5540E+00 # r<sup>2</sup> = 0.99920328  
analytic3 3.5239E-13 1.0869E+03 2.5540E+00 3.0000E+02 # r<sup>2</sup> = 0.99920328  
analytic4 3.6146E-13 9.2047E+02 2.5042E+00 3.0000E+02 1.4960E+02 # r<sup>2</sup> = 0.99986996

Methyl-site  
analytic1 8.0652E-11 4.6313E+03 # r<sup>2</sup> = 0.66361532  
analytic2 1.8539E-21 2.6751E+03 3.2030E+00 # r<sup>2</sup> = 0.99657391  
analytic3 1.5929E-13 2.6751E+03 3.2030E+00 3.0000E+02 # r<sup>2</sup> = 0.99657392  
analytic4 2.3567E-13 2.3679E+03 2.9301E+00 3.0000E+02 1.6213E+02 # r<sup>2</sup> = 0.99999275

Epsilon-site  
analytic1 1.7173E-10 5.0544E+03 # r<sup>2</sup> = 0.69182100  
analytic2 1.0087E-20 3.1732E+03 3.0803E+00 # r<sup>2</sup> = 0.99436296  
analytic3 4.3051E-13 3.1732E+03 3.0803E+00 3.0000E+02 # r<sup>2</sup> = 0.99436296  
analytic4 4.8568E-13 2.7015E+03 2.9136E+00 3.0000E+02 1.5118E+02 # r<sup>2</sup> = 0.99952970

Beta-site (add)  
analytic1 5.2939E-11 1.7579E+03 # r<sup>2</sup> = 0.83879736  
analytic2 8.0567E-17 6.8820E+02 1.7515E+00 # r<sup>2</sup> = 0.99966575  
analytic3 1.7574E-12 6.8820E+02 1.7515E+00 3.0000E+02 # r<sup>2</sup> = 0.99966575  
analytic4 1.8299E-12 5.9030E+02 1.7088E+00 3.0000E+02 1.5343E+02 # r<sup>2</sup> = 0.99996538

Gamma-site (add)  
analytic1 5.6322E-11 1.6975E+03 # r<sup>2</sup> = 0.86291131  
analytic2 3.6187E-16 7.4280E+02 1.5632E+00 # r<sup>2</sup> = 0.99983176  
analytic3 2.6964E-12 7.4280E+02 1.5632E+00 3.0000E+02 # r<sup>2</sup> = 0.99983176  
analytic4 2.5970E-12 6.1257E+02 1.5544E+00 3.0000E+02 1.4086E+02 # r<sup>2</sup> = 0.99998754

## S8.5. (Z)-4mhex

Alpha-site  
analytic1 3.9834E-11 3.4613E+03 # r<sup>2</sup> = 0.67327532  
analytic2 1.7226E-21 1.5556E+03 3.1203E+00 # r<sup>2</sup> = 0.99549420  
analytic3 9.2383E-14 1.5556E+03 3.1203E+00 3.0000E+02 # r<sup>2</sup> = 0.99549420

Beta-site  
analytic1 3.8727E-11 2.8051E+03 # r<sup>2</sup> = 0.70900789  
analytic2 2.7907E-20 1.1240E+03 2.7525E+00 # r<sup>2</sup> = 0.99875413  
analytic3 1.8363E-13 1.1240E+03 2.7525E+00 3.0000E+02 # r<sup>2</sup> = 0.99875413  
analytic4 2.0962E-13 9.8483E+02 2.6525E+00 3.0000E+02 1.5945E+02 # r<sup>2</sup> = 0.99983953

Gamma-site  
analytic1 1.0477E-10 6.1416E+03 # r<sup>2</sup> = 0.74049848

|           |            |            |            |            |            |                               |
|-----------|------------|------------|------------|------------|------------|-------------------------------|
| analytic2 | 4.6342E-20 | 4.4216E+03 | 2.8163E+00 |            |            | # r <sup>2</sup> = 0.99271491 |
| analytic3 | 4.3881E-13 | 4.4216E+03 | 2.8163E+00 | 3.0000E+02 |            | # r <sup>2</sup> = 0.99271491 |
| analytic4 | 5.6591E-13 | 3.7908E+03 | 2.5443E+00 | 3.0000E+02 | 1.5317E+02 | # r <sup>2</sup> = 0.99995746 |

Delta-site

|           |            |            |            |            |            |                               |
|-----------|------------|------------|------------|------------|------------|-------------------------------|
| analytic1 | 1.0492E-10 | 5.9846E+03 |            |            |            | # r <sup>2</sup> = 0.72574800 |
| analytic2 | 2.2052E-20 | 4.2051E+03 | 2.9136E+00 |            |            | # r <sup>2</sup> = 0.99248045 |
| analytic3 | 3.6372E-13 | 4.2051E+03 | 2.9136E+00 | 3.0000E+02 |            | # r <sup>2</sup> = 0.99248045 |
| analytic4 | 2.9974E-13 | 3.4736E+03 | 2.8550E+00 | 3.0000E+02 | 1.4154E+02 | # r <sup>2</sup> = 0.99890151 |

Methyl-site

|           |            |            |            |            |            |                               |
|-----------|------------|------------|------------|------------|------------|-------------------------------|
| analytic1 | 1.2512E-10 | 4.7948E+03 |            |            |            | # r <sup>2</sup> = 0.64997316 |
| analytic2 | 4.0770E-22 | 2.6826E+03 | 3.4584E+00 |            |            | # r <sup>2</sup> = 0.98770945 |
| analytic3 | 1.5039E-13 | 2.6826E+03 | 3.4584E+00 | 3.0000E+02 |            | # r <sup>2</sup> = 0.98770945 |
| analytic4 | 3.5340E-13 | 2.5233E+03 | 2.9759E+00 | 3.0000E+02 | 1.7715E+02 | # r <sup>2</sup> = 0.99921919 |

Epsilon-site

|           |            |            |            |            |            |                               |
|-----------|------------|------------|------------|------------|------------|-------------------------------|
| analytic1 | 9.0461E-11 | 3.2272E+03 |            |            |            | # r <sup>2</sup> = 0.65809225 |
| analytic2 | 2.1170E-21 | 1.2725E+03 | 3.2006E+00 |            |            | # r <sup>2</sup> = 0.99566259 |
| analytic3 | 1.7948E-13 | 1.2725E+03 | 3.2006E+00 | 3.0000E+02 |            | # r <sup>2</sup> = 0.99566259 |
| analytic4 | 3.2680E-13 | 1.2610E+03 | 2.8844E+00 | 3.0000E+02 | 1.8860E+02 | # r <sup>2</sup> = 0.99964001 |

Gamma-site (add)

|           |            |            |            |            |            |                               |
|-----------|------------|------------|------------|------------|------------|-------------------------------|
| analytic1 | 4.3103E-11 | 1.5720E+03 |            |            |            | # r <sup>2</sup> = 0.80980038 |
| analytic2 | 1.8638E-17 | 4.0181E+02 | 1.9160E+00 |            |            | # r <sup>2</sup> = 0.99946665 |
| analytic3 | 1.0392E-12 | 4.0181E+02 | 1.9160E+00 | 3.0000E+02 |            | # r <sup>2</sup> = 0.99946665 |
| analytic4 | 1.2549E-12 | 3.9800E+02 | 1.8165E+00 | 3.0000E+02 | 1.8855E+02 | # r <sup>2</sup> = 0.99993581 |

Delta-site (add)

|           |            |            |            |            |            |                               |
|-----------|------------|------------|------------|------------|------------|-------------------------------|
| analytic1 | 4.8782E-11 | 1.7539E+03 |            |            |            | # r <sup>2</sup> = 0.84781784 |
| analytic2 | 1.2446E-16 | 7.2541E+02 | 1.6840E+00 |            |            | # r <sup>2</sup> = 0.99974809 |
| analytic3 | 1.8467E-12 | 7.2541E+02 | 1.6840E+00 | 3.0000E+02 |            | # r <sup>2</sup> = 0.99974809 |
| analytic4 | 1.8869E-12 | 6.1574E+02 | 1.6486E+00 | 3.0000E+02 | 1.5026E+02 | # r <sup>2</sup> = 0.99998642 |

## S8.6. (E)-4mhex

Alpha-site

|           |            |            |            |            |            |                               |
|-----------|------------|------------|------------|------------|------------|-------------------------------|
| analytic1 | 3.7225E-11 | 3.5322E+03 |            |            |            | # r <sup>2</sup> = 0.68579425 |
| analytic2 | 3.2648E-21 | 1.6830E+03 | 3.0279E+00 |            |            | # r <sup>2</sup> = 0.99617343 |
| analytic3 | 1.0333E-13 | 1.6830E+03 | 3.0279E+00 | 3.0000E+02 |            | # r <sup>2</sup> = 0.99617343 |
| analytic4 | 1.4692E-13 | 1.5234E+03 | 2.8084E+00 | 3.0000E+02 | 1.6798E+02 | # r <sup>2</sup> = 0.99959521 |

Beta-site

|           |            |            |            |            |            |                               |
|-----------|------------|------------|------------|------------|------------|-------------------------------|
| analytic1 | 4.0437E-11 | 2.8297E+03 |            |            |            | # r <sup>2</sup> = 0.72264039 |
| analytic2 | 6.9105E-20 | 1.2176E+03 | 2.6396E+00 |            |            | # r <sup>2</sup> = 0.99928876 |
| analytic3 | 2.3880E-13 | 1.2176E+03 | 2.6396E+00 | 3.0000E+02 |            | # r <sup>2</sup> = 0.99928876 |
| analytic4 | 2.2997E-13 | 1.0112E+03 | 2.6141E+00 | 3.0000E+02 | 1.4330E+02 | # r <sup>2</sup> = 0.99987639 |

Gamma-site

|           |            |            |            |            |            |                               |
|-----------|------------|------------|------------|------------|------------|-------------------------------|
| analytic1 | 1.0940E-10 | 6.4077E+03 |            |            |            | # r <sup>2</sup> = 0.77073754 |
| analytic2 | 3.6447E-19 | 4.8490E+03 | 2.5523E+00 |            |            | # r <sup>2</sup> = 0.99563088 |
| analytic3 | 7.6558E-13 | 4.8490E+03 | 2.5523E+00 | 3.0000E+02 |            | # r <sup>2</sup> = 0.99563088 |
| analytic4 | 3.9458E-13 | 3.8791E+03 | 2.6882E+00 | 3.0000E+02 | 1.2923E+02 | # r <sup>2</sup> = 0.99919251 |

Delta-site

|           |            |            |            |            |  |                               |
|-----------|------------|------------|------------|------------|--|-------------------------------|
| analytic1 | 8.8613E-11 | 6.3389E+03 |            |            |  | # r <sup>2</sup> = 0.75954320 |
| analytic2 | 1.5269E-19 | 4.7275E+03 | 2.6385E+00 |            |  | # r <sup>2</sup> = 0.99524671 |
| analytic3 | 5.2441E-13 | 4.7275E+03 | 2.6385E+00 | 3.0000E+02 |  | # r <sup>2</sup> = 0.99524671 |

analytic4 4.9181E-13 3.9506E+03 2.5017E+00 3.0000E+02 1.4525E+02 # r<sup>2</sup> = 0.99999171

Methyl-site

analytic1 1.2071E-10 4.7872E+03 # r<sup>2</sup> = 0.66256063  
analytic2 7.8446E-22 2.7302E+03 3.3681E+00 # r<sup>2</sup> = 0.98833158  
analytic3 1.7292E-13 2.7302E+03 3.3681E+00 3.0000E+02 # r<sup>2</sup> = 0.98833159  
analytic4 3.8537E-13 2.5458E+03 2.9078E+00 3.0000E+02 1.7513E+02 # r<sup>2</sup> = 0.99926851

Epsilon-site

analytic1 8.2362E-11 3.1063E+03 # r<sup>2</sup> = 0.65793786  
analytic2 3.0275E-21 1.1876E+03 3.1416E+00 # r<sup>2</sup> = 0.99752371  
analytic3 1.8328E-13 1.1876E+03 3.1416E+00 3.0000E+02 # r<sup>2</sup> = 0.99752371  
analytic4 2.5035E-13 1.0955E+03 2.9580E+00 3.0000E+02 1.7261E+02 # r<sup>2</sup> = 0.99968912

Gamma-site (add)

analytic1 5.0039E-11 1.6046E+03 # r<sup>2</sup> = 0.85299339  
analytic2 2.3308E-16 6.2419E+02 1.6053E+00 # r<sup>2</sup> = 0.99989051  
analytic3 2.2075E-12 6.2419E+02 1.6053E+00 3.0000E+02 # r<sup>2</sup> = 0.99989051  
analytic4 2.1148E-12 5.1142E+02 1.6031E+00 3.0000E+02 1.3856E+02 # r<sup>2</sup> = 0.99999026

Delta-site (add)

analytic1 4.2640E-11 1.6120E+03 # r<sup>2</sup> = 0.91722894  
analytic2 2.9393E-15 8.4680E+02 1.2529E+00 # r<sup>2</sup> = 0.99699677  
analytic3 3.7316E-12 8.4680E+02 1.2529E+00 3.0000E+02 # r<sup>2</sup> = 0.99699677  
analytic4 5.7384E-12 8.4979E+02 1.0285E+00 3.0000E+02 1.9133E+02 # r<sup>2</sup> = 0.99902255

## S8.7. 5mhex

Alpha-site

analytic1 3.8176E-11 3.4870E+03 # r<sup>2</sup> = 0.69493577  
analytic2 5.2750E-21 1.6741E+03 2.9684E+00 # r<sup>2</sup> = 0.99611896  
analytic3 1.1895E-13 1.6741E+03 2.9684E+00 3.0000E+02 # r<sup>2</sup> = 0.99611896  
analytic4 1.6718E-13 1.5122E+03 2.7546E+00 3.0000E+02 1.6747E+02 # r<sup>2</sup> = 0.99954477

Beta-site

analytic1 6.0026E-11 4.0342E+03 # r<sup>2</sup> = 0.73451838  
analytic2 9.4277E-20 2.4154E+03 2.6506E+00 # r<sup>2</sup> = 0.99861787  
analytic3 3.4696E-13 2.4154E+03 2.6506E+00 3.0000E+02 # r<sup>2</sup> = 0.99861787  
analytic4 2.7999E-13 1.9650E+03 2.6645E+00 3.0000E+02 1.3587E+02 # r<sup>2</sup> = 0.99980110

Gamma-site

analytic1 3.7602E-11 2.7079E+03 # r<sup>2</sup> = 0.71800517  
analytic2 4.6238E-20 1.0695E+03 2.6826E+00 # r<sup>2</sup> = 0.99886800  
analytic3 2.0424E-13 1.0695E+03 2.6826E+00 3.0000E+02 # r<sup>2</sup> = 0.99886800  
analytic4 2.2701E-13 9.3069E+02 2.5968E+00 3.0000E+02 1.5758E+02 # r<sup>2</sup> = 0.99982732

Delta-site

analytic1 1.0558E-10 5.9940E+03 # r<sup>2</sup> = 0.76602827  
analytic2 8.3979E-19 4.5047E+03 2.4385E+00 # r<sup>2</sup> = 0.99934965  
analytic3 9.2177E-13 4.5047E+03 2.4385E+00 3.0000E+02 # r<sup>2</sup> = 0.99934965  
analytic4 3.4607E-13 3.5082E+03 2.7353E+00 3.0000E+02 1.1570E+02 # r<sup>2</sup> = 0.99984185

Methyl-site

analytic1 8.5780E-11 4.6938E+03 # r<sup>2</sup> = 0.65698468  
analytic2 4.2968E-22 2.6159E+03 3.4022E+00 # r<sup>2</sup> = 0.98830085  
analytic3 1.1501E-13 2.6159E+03 3.4022E+00 3.0000E+02 # r<sup>2</sup> = 0.98830085  
analytic4 2.6974E-13 2.4669E+03 2.9230E+00 3.0000E+02 1.7774E+02 # r<sup>2</sup> = 0.99929445

```

Epsilon1-site
analytic1  1.3880E-10  7.9511E+03                                # r^2 = 0.78625050
analytic2  3.0531E-18  6.5430E+03  2.3055E+00                                # r^2 = 0.99945833
analytic3  1.5694E-12  6.5430E+03  2.3055E+00  3.0000E+02  # r^2 = 0.99945833
analytic4  3.3150E-11  7.4854E+03  7.3581E-01  3.0000E+02  2.0398E-05 # r^2 = 0.89151089

Epsilon2-site
analytic1  6.4796E-11  7.6743E+03                                # r^2 = 0.75313120
analytic2  1.9202E-19  6.1061E+03  2.5676E+00                                # r^2 = 0.99878651
analytic3  4.4013E-13  6.1061E+03  2.5676E+00  3.0000E+02  # r^2 = 0.99878651
analytic4  6.3019E-14  4.6366E+03  3.2693E+00  3.0000E+02  9.0833E+01 # r^2 = 0.99689596

Delta-site (add)
analytic1  3.0053E-11  1.9248E+03                                # r^2 = 0.89043466
analytic2  6.1213E-16  1.0622E+03  1.4123E+00                                # r^2 = 0.99941654
analytic3  1.9292E-12  1.0622E+03  1.4123E+00  3.0000E+02  # r^2 = 0.99941654
analytic4  2.1624E-12  9.2722E+02  1.3229E+00  3.0000E+02  1.5841E+02 # r^2 = 0.99959503

Epsilon-site (add)
analytic1  3.5201E-11  1.1510E+03                                # r^2 = 0.83694016
analytic2  3.0920E-16  2.2131E+02  1.5223E+00                                # r^2 = 0.99993547
analytic3  1.8247E-12  2.2131E+02  1.5223E+00  3.0000E+02  # r^2 = 0.99993547
analytic4  1.7025E-12  1.7848E+02  1.5494E+00  3.0000E+02  4.3696E+01 # r^2 = 0.99996035

```

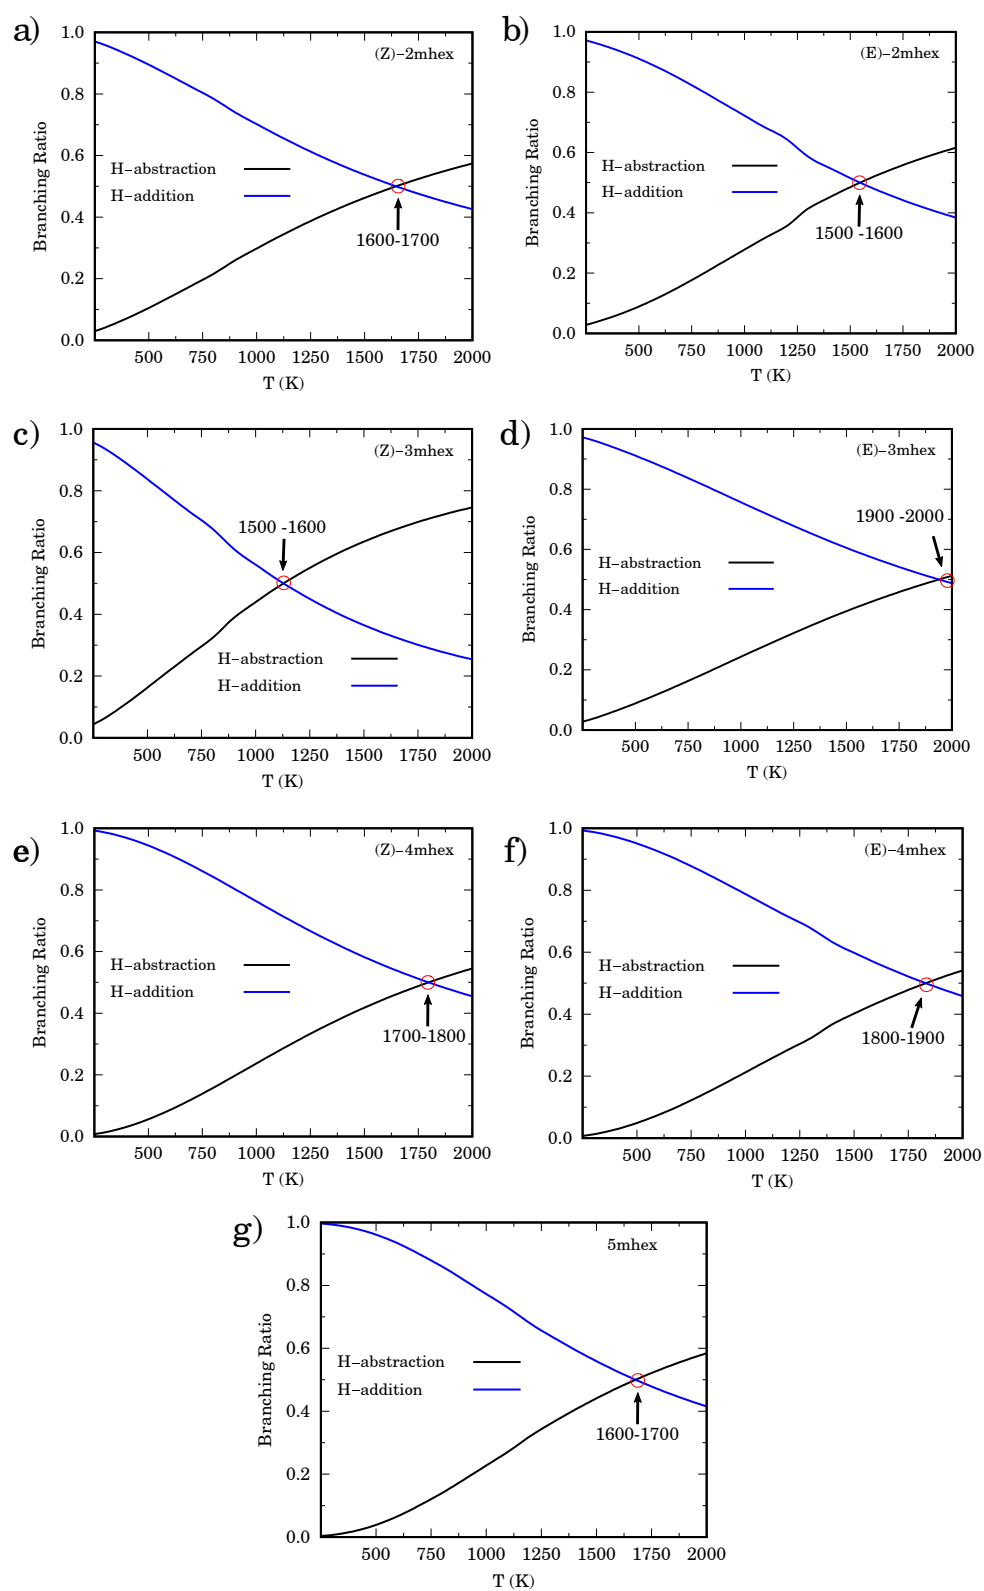

Fig. S3.: Branching ratio of the summed contributions from H-abstraction and addition reaction sites for (a) methyl (*Z*)-hex-2-enoate, (b) methyl (*E*)-hex-2-enoate, (c) methyl (*Z*)-hex-3-enoate, (d) methyl (*E*)-hex-3-enoate, (e) methyl (*Z*)-hex-4-enoate, (f) methyl (*E*)-hex-4-enoate, and (g) methyl hex-5-enoate.
